# Quantitative genetics of temperature performance curves of *Neurospora crassa*

Neda N. Moghadam<sup>1</sup>, Karendeep Sidhu<sup>1</sup>, Pauliina A. M. Summanen<sup>1</sup>,  
Tarmo Ketola<sup>1</sup>, Ilkka Kronholm<sup>1</sup>

<sup>1</sup>Department of Biological and Environmental Science, University of Jyväskylä, FI-40014 Jyväskylä,  
Finland

Running Head: Genetics of performance curves

Keywords: fungi, reaction norm, G-matrix, phenotypic plasticity, evolvability

Corresponding author:

Ilkka Kronholm

Department of Biological and Environmental Science,

University of Jyväskylä,

P.O. Box 35, FI-40014

Jyväskylä,

Finland

Fax +358 14 617 239

Email: [ilkka.kronholm@jyu.fi](mailto:ilkka.kronholm@jyu.fi)

### **Author contributions**

The study was conceived by IK and TK; experimental design by IK, NNM, TK, and KS; experiments and data collection performed by NNM, KS, PAMS and IK; data analysis by IK, NNM, and KS; manuscript was written by IK, with input from all other authors.

### **Acknowledgements**

This study was funded by grants from Emil Aaltonen foundation and Ella & Georg Ehrnrooth foundation to IK and Academy of Finland Research Fellowships to IK (no. 321584) and TK (no. 278751). We'd like to thank Matthieu Bruneaux for comments on the manuscript.

### **Data accessibility statement**

The data and analysis scripts will be deposited to Data dryad upon acceptance.

## Abstract

1  
2 Earth's temperature is increasing due to anthropogenic CO<sub>2</sub> emissions; and organ-  
3 isms need either to adapt to higher temperatures, migrate into colder areas, or face  
4 extinction. Temperature affects nearly all aspects of an organism's physiology via its  
5 influence on metabolic rate and protein structure, therefore genetic adaptation to in-  
6 creased temperature may be much harder to achieve compared to other abiotic stresses.  
7 There is still much to be learned about the evolutionary potential for adaptation to  
8 higher temperatures, therefore we studied the quantitative genetics of growth rates in  
9 different temperatures that make up the thermal performance curve of the fungal model  
10 system *Neurospora crassa*. We studied the amount of genetic variation for thermal  
11 performance curves and examined possible genetic constraints by estimating the G-  
12 matrix. We observed a substantial amount of genetic variation for growth in different  
13 temperatures, and most genetic variation was for performance curve elevation. Con-  
14 trary to common theoretical assumptions, we did not find strong evidence for genetic  
15 trade-offs for growth between hotter and colder temperatures. We also simulated short  
16 term evolution of thermal performance curves of *N. crassa*, and suggest that they can  
17 have versatile responses to selection.

## 18 **Introduction**

19 Earth's temperature is rising due to anthropogenic activities (IPCC, 2013). The challenge most  
20 organisms will face in a warming world is that they have to either adapt to warmer conditions or  
21 migrate into colder areas to avoid extinction (Deutsch et al., 2008; Dillon et al., 2010; Araújo et al.,  
22 2013; Merilä and Hendry, 2014). Temperature is a unique abiotic stress, because the kinetics of  
23 all biochemical reactions and protein stability are affected by temperature. As such, temperature  
24 influences nearly all aspects of an ectothermic organism's physiology (Schulte, 2015; Arcus et al.,  
25 2016). Therefore, adapting to a higher temperature may be much more difficult than adapting to  
26 a more specific environmental stress. For some anthropogenic stresses, such as antibiotics or her-  
27 bicides, decades of research have revealed strong evolutionary adaptation to these stresses (Davies  
28 and Davies, 2010; Powles and Yu, 2010). However, genetic basis of adaptation to temperature is  
29 likely to be much more complex (Hochachka and Somero, 2002).

30 According to quantitative genetic theory, evolution is possible if variation in a trait is heritable  
31 and selection acts on this variation. However, the evolution of multivariate traits can be complicated  
32 by genetic correlations, allowing evolution to proceed only in few directions or possibly preventing  
33 it altogether (Walsh and Blows, 2009). The more integrated traits are with each other, the more  
34 difficult the evolution of the underlying genetic network and the phenotype can be.

35 The ability of an organism to tolerate different temperatures is often described by a thermal  
36 performance curve (Huey and Kingsolver, 1989, 1993), which describes the fitness or performance  
37 of an organism as a function of temperature (Figure 1A). These curves have been used to predict  
38 how organisms potentially respond to increased temperatures (Deutsch et al., 2008; Araújo et al.,  
39 2013; Sinclair et al., 2016). In general, thermal performance curves or reaction norms have been  
40 thought to evolve by either changes in elevation (Figure 1B), left or right shifts in the curve that  
41 lead to changes in optimum temperature or temperature limits (Figure 1C), or changes in curve  
42 shape (Figure 1D).

43 Certain biochemical constraints may explain the characteristic shape changes of performance  
44 curves (Angilletta et al., 2003). For example, high enzyme stability could allow tolerating high tem-

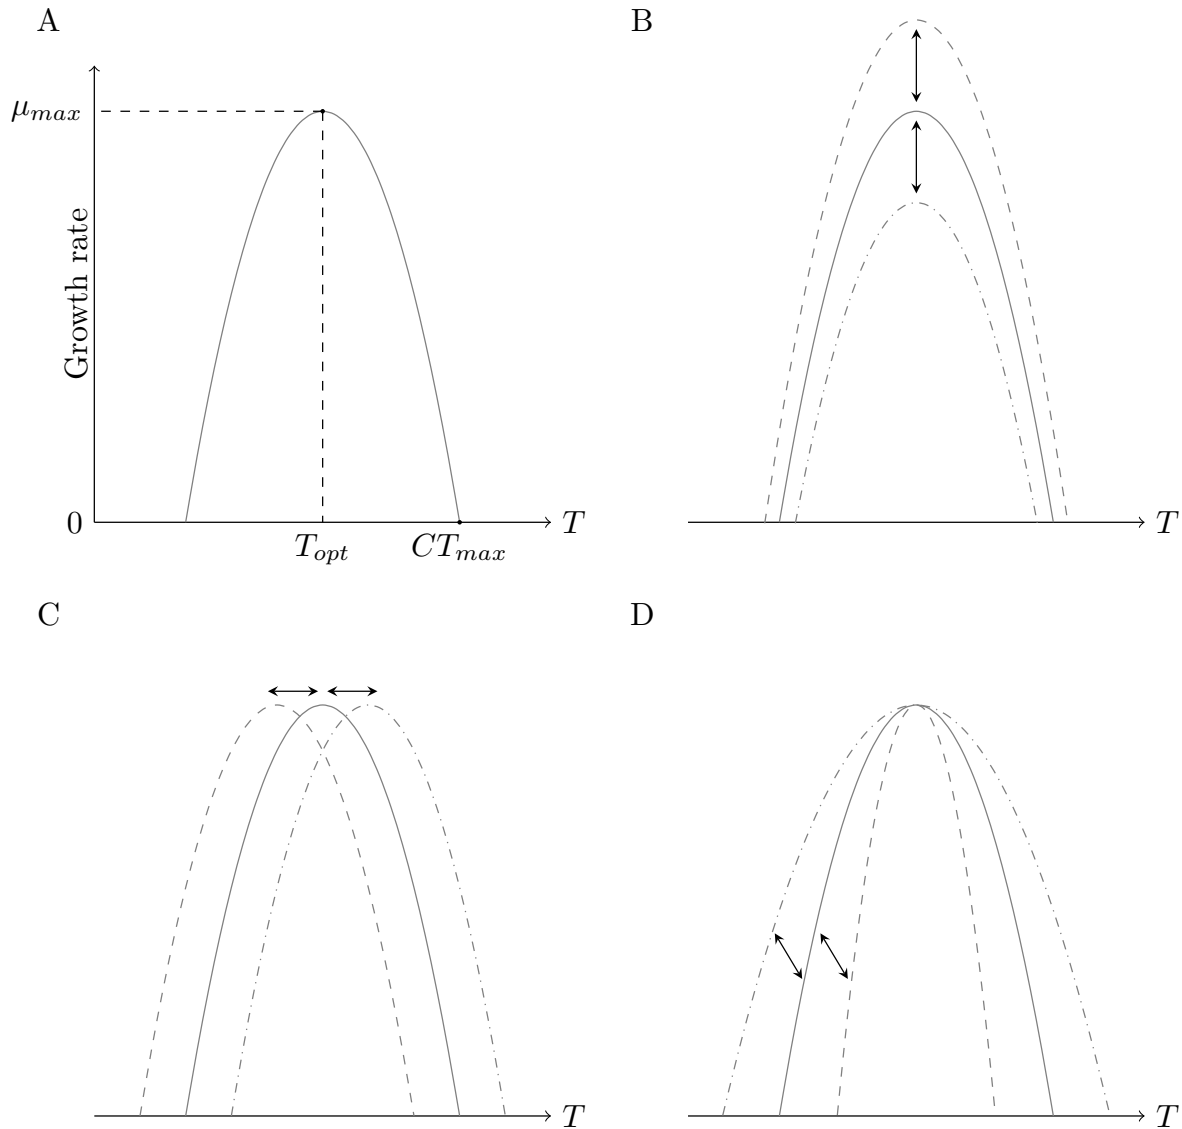

Figure 1: A) An illustration of a hypothetical temperature performance curve. Temperature is on the horizontal axis and growth rate is on the vertical axis.  $T_{opt}$  shows the optimal temperature, where growth rate has its maximum value,  $\mu_{max}$ . Temperature where growth rate reaches zero as temperature increases is denoted as  $CT_{max}$ . B) Change in reaction norm elevation shifts the reaction norm on the vertical axis. C) A horizontal shift. D) Change in reaction norm shape.

45 peratures with the expense of reduction of performance in cold temperatures resulting in a hot-cold  
46 trade-off. Two enzymes with different optima could allow broader thermal tolerance but with an  
47 energetic expense of expressing two proteins, leading to reduction of performance at intermediate  
48 temperatures and producing a specialist-generalist tradeoff. Furthermore, the biochemical activa-  
49 tion energy provided by higher temperatures can lead to thermodynamic effects: genotypes with  
50 higher optimal temperatures also have higher performance (Hochachka and Somero, 2002). Ther-  
51 modynamic effect is also called the “hotter is better” hypothesis. If thermal performance curves  
52 are determined by such underlying patterns, measurements need to be done in multiple temper-  
53 atures and results analyzed by multivariate methods in order to determine the ability of thermal  
54 performance to evolve.

55 While several studies have tested how different species or populations differ in their thermal  
56 performance curves, or if evolution has been able to shape them (e.g. Krenek et al., 2011; Klepsa-  
57 tel et al., 2013; Ketola and Saarinen, 2015; Ashrafi et al., 2018; Maclean et al., 2019), only a few  
58 studies have determined the evolutionary potential of thermal performance curves. In these studies,  
59 the genetic variance-covariance matrix (**G**-matrix) for thermal performance across several temper-  
60 atures has been estimated, and how genetic variation is aligned with characteristic directions of  
61 reaction norm evolution has been determined (e.g. Izem and Kingsolver, 2005; Stinchcombe et al.,  
62 2010; Latimer et al., 2015; Logan et al., 2020). This is essential in order to explore how freely  
63 thermal performance can evolve in different environments, and to quantify if thermal performance  
64 evolution is bound to follow a certain evolutionary path or performance curve shape. Constraints  
65 on performance curve evolution will affect the ability of populations to respond to increasing tem-  
66 peratures, which is crucial, as studies suggest that plastic responses alone may not be enough for  
67 most species for dealing with coming temperature increases (Gunderson and Stillman, 2015).

68 However, in the midst of multivariate genetics and the emphasis on finding genetic constraints, it  
69 should be remembered that evolutionary change follows from selection. From quantitative genetic  
70 parameters one can only deduce which traits have the highest amount of variation, and what is  
71 the alignment of the **G**-matrix with respect to characteristic thermal performance curve shapes.

72 However, unless genetic correlations are exactly  $-1$  or  $1$ , or if selection occurs exactly to the  
73 direction of zero genetic variation, evolutionary change to a particular direction is not prohibited,  
74 only slowed down.

75 To explore constraints of thermal performance curve evolution, we are using the filamentous  
76 fungus *Neurospora crassa* as a model system to study the quantitative genetics of thermal perfor-  
77 mance curves. *N. crassa* is a genetic model system that has been used extensively in different as-  
78 pects of genetic research (Roche et al., 2014). However, only recently some studies have started to  
79 explore quantitative variation in *N. crassa* (Ellison et al., 2011; Palma-Guerrero et al., 2013). This  
80 is despite *N. crassa* having excellent properties for the study of quantitative genetics: *N. crassa*  
81 can reproduce either asexually or sexually, so analysis of clones is possible for quantitative genetic  
82 experiments and controlled crosses can be made. Comparatively little is known about the ecology  
83 of *N. crassa*; it is a saprotrophic organism that decomposes dead plant matter, and it is particularly  
84 found on burned vegetation. Its geographic distribution is concentrated in mainly tropical and sub-  
85 tropical regions (Turner et al., 2001). Most strains have been collected from the Caribbean basin,  
86 southeastern United States, west Africa, and India (Turner et al., 2001), but the species also occurs  
87 in southern Europe (Jacobson et al., 2006).

88 Specifically, we asked the following questions: 1) Is there genetic variation in thermal perfor-  
89 mance curves in *N. crassa*? 2) Is variation in performance curves mainly for elevation, location, or  
90 shape? 3) Do constraints exist for performance curve evolution in the short term and what are these  
91 constraints?

92 To address how much there is genetic variation in temperature performance curves, we used  
93 a panel of strains of *N. crassa* that had earlier been sampled from natural populations. We also  
94 crossed certain strains together to generate additional families. We measured the growth rates of  
95 these strains in different temperatures and combine these measurements into a thermal performance  
96 curve, and used a multivariate model to estimate the G-matrix of performance at different temper-  
97 atures. We then used the empirical estimates of genetic variation in a quantitative genetic model to  
98 describe the short term evolutionary potential of temperature performance curves of *N. crassa*.

## 99 **Materials and methods**

### 100 *Neurospora crassa* strains

101 We used a panel of strains originally obtained from the Fungal Genetics Stock Center (McCluskey  
102 et al., 2010). Our sample included natural strains collected from Louisiana (USA), Caribbean, and  
103 Central America (Ellison et al., 2011; Palma-Guerrero et al., 2013), 113 natural strains in total. In  
104 addition we made crosses between some of the strains to obtain additional families and increase  
105 the amount of genetic variation segregating among our lines. We crossed strains 10948  $\times$  10886  
106 to obtain family A ( $n = 94$ ), 10932  $\times$  1165 to obtain family B, ( $n = 50$ ), 4498  $\times$  8816 to obtain  
107 family C ( $n = 50$ ), 3223  $\times$  8845 to obtain family D, ( $n = 52$ ), and 10904  $\times$  851 to obtain family  
108 G ( $n = 69$ ). Parents were chosen to have crosses within the Louisiana strains and between the  
109 Louisiana and Caribbean strains. In total, the panel contained 428 strains and based on genotypic  
110 data (Ellison et al., 2011; Palma-Guerrero et al., 2013) all strains represent unique genotypes. Table  
111 S1 contains a list and information about the used strains. Strain numbering in family G runs up to  
112 72, because strains G2, G9, and G51 grew very poorly and were excluded from the experiment.

### 113 **Phenotyping**

114 Standard laboratory methods were used to maintain *Neurospora* cultures (Davis and de Serres,  
115 1970). We measured growth rates using a tube method described in Kronholm et al. (2016) but  
116 instead of parafilm we used silicone plugs to cap the tubes. We measured the linear growth rate  
117 of each genotype in six different temperatures: 20, 25, 30, 35, 37.5, and 40 °C. Temperatures  
118 were chosen based on known reaction norm for strain 2489 (Kronholm et al., 2016). Three clonal  
119 replicates were measured for each genotype at each temperature. This gave a total of 7704 growth  
120 assays. In some assays the inoculation failed and the strain did not grow, or water droplets moved  
121 the inoculum along the pipette and linear growth rate could no longer be measured. There were 19  
122 such assays and these were recorded as missing data, thus the number of growth assays in the final  
123 dataset was 7685. Strains were grown in two growth chambers (MTM-313 Plant Growth Chamber,



124 HiPoint Corp., Taiwan) that contained three compartments, each with adjustable temperature. We  
125 rotated the temperatures among the different compartments between replicates, so that replicates of  
126 the same temperature were measured in different compartments, and monitored the temperature in  
127 the compartments with data loggers.

## 128 **Statistical analysis**

129 All statistical analyses were performed with R 3.6.0 (R Core Team, 2019). Bayesian models were  
130 implemented using the Stan language (Carpenter et al., 2017) which uses Hamiltonian Monte Carlo  
131 sampling. Hamiltonian Monte Carlo is much more efficient than traditional MCMC algorithms,  
132 such as Gibbs sampling, and can potentially accommodate very large number of parameters. An  
133 accessible introduction can be found in McElreath (2015). Stan was interfaced using the 'brms'  
134 2.9.0 R package (Bürkner, 2018). MCMC convergence was monitored by trace plots and  $\hat{R}$  val-  
135 ues. We considered parameter values to be different if their 95% highest posterior density (HPD)  
136 intervals did not overlap.

## 137 **Thermodynamics of thermal performance curves**

138 Theory predicts that if differences between hot and cold adapted genotypes are determined solely  
139 by an effect of temperature on metabolic rate, named the thermodynamic effect or “hotter is better”  
140 hypothesis, there should be a negative relationship between the logarithm of maximal growth rate,  
141  $\mu_{max}$ , and  $1/(kT_{opt})$ , where  $k$  is the Boltzmann’s constant, and  $T_{opt}$  is the temperature (in K)  
142 at which maximal growth rate occurs (Savage et al., 2004). We examined whether differences  
143 between *N. crassa* genotypes could be solely explained by a thermodynamic effect. When  $\ln(\mu_{max})$   
144 is plotted against  $1/(kT_{opt})$  the slope of a regression line is equal to negative activation energy,  
145  $-E$ . The thermodynamic expectation for the slope is  $-0.6$  because 0.6 eV is the average activation  
146 energy for biochemical reactions in the cell. This pattern generally holds across taxa adapted  
147 to different temperatures (Savage et al., 2004; Sørensen et al., 2018). Slopes greater than  $-0.6$   
148 have been interpreted as an indication of other physiological or biochemical reasons rather than a

149 thermodynamic effect (Sørensen et al., 2018).

150 To calculate the optimum temperature for each genotype without using a specific model that  
151 may fit for some genotypes better than others, we fitted natural splines for each genotype. We  
152 extracted the maximum growth rate ( $\mu_{max}$ ) and optimum temperature ( $T_{opt}$ ) from the spline fit. We  
153 then fit a model

$$\ln(y_i) \sim N(\mu_i, \sigma) \quad (1)$$

$$\mu_i = \alpha + \beta \times T_{opt,i}$$

$$\alpha, \beta \sim N(0, 10)$$

$$\sigma \sim \text{hC}(0, 2)$$

154 where  $y_i$  is the  $i$ th maximum growth rate,  $\alpha$  is the intercept,  $\beta$  is the slope, and  $T_{opt,i}$  is the  $i$ th  
155 optimum temperature. We used weakly regularizing priors: a normal distribution for  $\alpha$  and  $\beta$ , and  
156 a half-cauchy distribution for  $\sigma$  with location 0 and scale 2. MCMC estimation was done using two  
157 chains, with a warmup of 1000 iterations, followed by 4000 iterations of sampling. For this analysis  
158 we removed genotypes from the data that had very low maximal growth rates  $\ln(\mu_{max}) < 1$ , which  
159 is  $\mu_{max} < 2.72$  mm/h, as they did not have the typical tolerance curve shape and were outliers.  
160 These genotypes typically grew very slowly and reaction norms were much flatter than typical  
161 ones, which leads to larger uncertainty in estimating the optimal temperature from the spline fits  
162 (Figure S1A). 14 genotypes were removed, this left 414 genotypes for the analysis. However, since  
163 removing outlier observations can be considered subjective, we also applied robust regression with  
164 bisquare weights to the full data. Robust regression is a method that gives less weight to individual  
165 data points than ordinary regression and is less affected by outlier observations (Venables and  
166 Ripley, 2002).

## 167 **Estimation of genetic variance and covariance components**

168 We were interested in estimating the genetic variance and covariance components for growth rates  
169 at different temperatures that together describe different aspects of temperature performance curves.  
170 Because *Neurospora* can be propagated clonally, we can estimate genetic variance components  
171 using clonal analysis. Among genotype variance is an estimate of the genetic variance and within  
172 genotype variance is an estimate of the environmental variance (Lynch and Walsh, 1998). We used  
173 a multivariate model to estimate genetic variance components at each temperature and the genetic  
174 correlations of all possible temperature pairs. The advantage of this approach is that we do not have  
175 to assume any particular shape for the temperature reaction norm. The multivariate model was

$$\begin{aligned} \mathbf{y}_i &\sim \text{MVN}(\boldsymbol{\mu}_i, \mathbf{E}) & (2) \\ \boldsymbol{\mu}_i &= \boldsymbol{\alpha} + \boldsymbol{\alpha}_{\mathbf{g}[i]} \\ \boldsymbol{\alpha}_{\mathbf{g}[i]} &\sim \text{MVN}(0, \mathbf{G}) \\ \mathbf{G} &= \mathbf{S}_G \mathbf{R}_G \mathbf{S}_G \\ \mathbf{E} &= \mathbf{S}_E \mathbf{R}_E \mathbf{S}_E \end{aligned}$$

176 where  $\boldsymbol{\alpha}$  is a vector of intercepts,  $\boldsymbol{\alpha}_{\mathbf{g}[i]}$  is a vector of genotypic effects,  $\mathbf{S}_G$  and  $\mathbf{S}_E$  are  $6 \times 6$  diagonal  
177 matrices with genetic or environmental standard deviations on the diagonal, and  $\mathbf{R}_G$  and  $\mathbf{R}_E$  are  
178 matrices for genetic and environmental correlations respectively. We used weakly informative  
179 priors by using the half location-scale version of the student's t distribution with three degrees

180 of freedom and 10 as the scale parameter. Thus, the prior for intercept effects was

$$\alpha \sim \begin{pmatrix} \text{hT}(3, 2, 10) \\ \text{hT}(3, 3, 10) \\ \text{hT}(3, 4, 10) \\ \text{hT}(3, 4, 10) \\ \text{hT}(3, 4, 10) \\ \text{hT}(3, 3, 10) \end{pmatrix} \quad (3)$$

182 for growth rates from 20 to 40 °C. The prior for each standard deviation in the model was  
183  $\sigma \sim \text{hT}(3, 0, 10)$ , and we used an lkj prior for the correlation matrices:  $\mathbf{R}_E, \mathbf{R}_G \sim \text{LKJ}(1)$ .  
184 For MCMC estimation two chains were run with a warmup period of 1000 iterations, followed by  
185 5000 iterations of sampling, with thinning set to 2. By inspecting MCMC traceplots (Figure S2)  
186 and the diagnostic summary statistic  $\hat{R}$ , which was 1 for all parameters, we found no evidence of  
187 convergence problems.

### 188 **Genetic correlations and temperature differences**

189 We were also interested in how the genetic correlation of growth rates changes as temperatures  
190 are further apart. In order to examine how correlations change in a statistically rigorous manner,  
191 we calculated pairwise temperature differences for each estimated genetic correlation ( $n = 15$ ),  
192 and fitted a Bayesian linear model with genetic correlation as the response, taking into account the  
193 uncertainty in the estimated genetic correlations. This is a linear model with measurement error  
194 where uncertainty in the estimated genetic correlations is propagated to the intercept and slope  
195 estimates of the linear model, see McElreath (2015) for details. We compared models with or  
196 without slope effects for temperature and whether genetic correlations involving growth rate at 40  
197 °C had a different intercept or slope (Table 2). We used leave-one-out cross-validation method for  
198 model comparisons, implemented in the 'loo' R package (Vehtari et al., 2017). The models were  
199 compared using the leave-one-out information criterion; smaller values indicate greater support for

200 a model. The final model was

$$\begin{aligned}x_{est,i} &\sim N(\mu_i, \sigma) & (4) \\ \mu_i &= \alpha + \alpha_{40} \times c_i + \beta \times d_i \\ x_{obs,i} &\sim N(x_{est,i}, x_{sd,i}) \\ \alpha, \alpha_{40}, \beta &\sim N(0, 10) \\ \sigma &\sim \text{hC}(0, 2)\end{aligned}$$

201 where  $x_{obs,i}$  is the median of  $i$ th observed genetic correlation,  $x_{sd,i}$  is the observed standard deviation of  $i$ th genetic correlation,  $x_{est,i}$  is the estimated genetic correlation for  $i$ th observation,  $\alpha$  is the intercept,  $\alpha_{40}$  is the intercept effect when one of the temperatures is 40 °C,  $c_i$  is an indicator variable whether one of the temperatures is 40 °C,  $\beta$  is the slope effect, and  $d_i$  is the temperature difference for the  $i$ th observation. MCMC estimation was done using two chains, with a warmup of 1000 iterations, followed by 4000 iterations of sampling.

## 207 Quantitative genetics

208 We estimated heritability, the proportion of genetic variance of the total variance, for each temperature as

$$210 \quad H^2 = \frac{\sigma_G^2}{\sigma_G^2 + \sigma_E^2} \quad (5)$$

211 where  $\sigma_G^2$  is the genetic variance component and  $\sigma_E^2$  the environmental variance component. Because *Neurospora* is haploid, the dominance variance component is not defined. Genetic variance in haploids is composed of

$$214 \quad \sigma_G^2 = \sigma_A^2 + \sigma_{AA}^2 + \sigma_{AAA}^2 + \dots, \quad (6)$$

215 where  $\sigma_A^2$  is the additive variance and  $\sigma_{AA}^2$  is the additive  $\times$  additive epistatic variance,  $\sigma_{AAA}^2$  is the additive  $\times$  additive  $\times$  additive variance, and so on (Lynch and Walsh, 1998). With our experimental design we cannot estimate the epistatic variance terms, as is the case with many other common

218 quantitative genetic designs, and going further we assumed that epistatic variances were small and  
 219 were ignored. This seems like a strong assumption, but there is some justification for doing so:  
 220 even if there is plenty of epistasis at the level of gene action, this is not necessarily translated into  
 221 epistatic variance (Hill et al., 2008; Mäki-Tanila and Hill, 2014). Empirical data also suggest that  
 222 most genetic variation is additive (Hill et al., 2008). The genetic covariance of traits 1 and 2 is  
 223  $COV_{G_{1,2}} = \sigma_{G_1}\sigma_{G_2}r_{G_{1,2}}$ , where  $r_{G_{1,2}}$  is the correlation of the standard deviations or the genetic  
 224 correlation. Thus, genetic correlation for traits 1 and 2 can be defined as

$$225 \quad r_{G_{1,2}} = \frac{COV_{G_{1,2}}}{\sigma_{G_1}\sigma_{G_2}}. \quad (7)$$

226 In addition to heritabilities, we used coefficients of variation to compare genetic and environ-  
 227 mental variances. Heritability can be influenced by changes in either genetic or environmental  
 228 variance, and genetic variance by itself is not a unitless variable (Houle, 1992). The genetic coeffi-  
 229 cient of variation was:

$$230 \quad CV_G = 100 \times \frac{\sigma_G}{\bar{z}} \quad (8)$$

231 where  $\bar{z}$  is the mean phenotype. Accordingly, the environmental coefficient of variation was  $CV_E =$   
 232  $100\sigma_E/\bar{z}$ .

233 We obtained the  $\mathbf{G}$ -matrix to describe how the growth rates at different temperatures were cor-  
 234 related and to be able to calculate multivariate response to selection for thermal performance curves.  
 235 This matrix contains genetic variance components on the diagonal and covariance components on  
 236 off-diagonals, so for  $n$  traits  $\mathbf{G}$  is an  $n \times n$  matrix:

$$237 \quad \mathbf{G} = \begin{pmatrix} \sigma_{G_1}^2 & \sigma_{G_1}\sigma_{G_2}r_{G_{1,2}} & \cdots & \sigma_{G_1}\sigma_{G_n}r_{G_{1,n}} \\ \sigma_{G_1}\sigma_{G_2}r_{G_{1,2}} & \sigma_{G_2}^2 & \cdots & \sigma_{G_2}\sigma_{G_n}r_{G_{2,n}} \\ \vdots & \vdots & \ddots & \vdots \\ \sigma_{G_1}\sigma_{G_n}r_{G_{1,n}} & \sigma_{G_2}\sigma_{G_n}r_{G_{2,n}} & \cdots & \sigma_{G_n}^2 \end{pmatrix}. \quad (9)$$

238 For environmental variance it is possible to construct an analogous  $\mathbf{E}$ -matrix that is the environ-

239 mental variance-covariance matrix.

240 We performed eigen decomposition of the  $\mathbf{G}$ -matrix to gain insight into genetic constraints  
241 of reaction norm evolution. The eigenvector corresponding the leading eigenvalue, or the first  
242 principle component, gives the direction of multivariate evolution with the least genetic resistance  
243 (Schluter, 1996). We obtained these components by principle component analysis of the  $\mathbf{G}$ -matrix.  
244 To assess uncertainty in the eigen decomposition we constructed a  $\mathbf{G}$ -matrix for each posterior  
245 sample and performed decomposition for each  $\mathbf{G}$ -matrix to obtain posterior distributions for how  
246 much variance the different components explained and for the component loadings. Obtaining  
247 interval estimates for the loadings this way is valid only if the order of eigenvectors stays consistent  
248 between the samples, and we could confirm this for the components one and two.

249 To assess evolvability and constraint across the different growth rates we used the approach  
250 of Hansen and Houle (2008). Assuming there is a directional selection gradient  $\beta$  in multivariate  
251 space, they define evolvability as the length of the response to selection in the direction of  $\beta$ , this is  
252 the same as projection of response to selection on  $\beta$  (Hansen and Houle, 2008). Evolvability was  
253 calculated as

$$254 \quad e(\beta) = \frac{\beta^T \mathbf{G} \beta}{|\beta|^2}. \quad (10)$$

255 Furthermore they define conditional evolvability as the response to selection in the direction of  $\beta$ ,  
256 assuming that there is stabilizing selection around the direction of  $\beta$  and the population cannot  
257 deviate from this direction. For conditional evolvability we first calculated unit vector of  $\beta$  as

$$258 \quad \hat{\beta} = \frac{\beta}{|\beta|}$$

259 and conditional evolvability is then

$$260 \quad c(\hat{\beta}) = (\hat{\beta} \mathbf{G}^{-1} \hat{\beta})^{-1}. \quad (11)$$

261 To assess whether evolvability along a certain selection gradient is particularly high or low it is possi-

262 ble to calculate average evolvabilities over random selection gradients in phenotypic space. Hansen  
263 and Houle (2008) derived analytical and approximate solutions for average evolvability and average  
264 conditional evolvability and we calculated these following their approach. Evolvabilities for single  
265 traits are just the genetic variances of those traits. Conditional evolvability for a single trait can be  
266 measured with respect to other traits. Conditional evolvability for trait  $i$  is  $c_i = 1/[G^{-1}]_{ii}$ , where  
267  $[G]_{ii}$  is the  $i$ th diagonal element of the  $G$ -matrix. Trait autonomy, the proportion of evolvability  
268 that remains after conditioning for the other traits, is calculated as  $a_i = ([G^{-1}]_{ii}[G]_{ii})^{-1}$  (Hansen  
269 and Houle, 2008). Since there are scale differences in the growth rates at different temperatures, we  
270 calculated conditional evolvabilities for both on the original scale and on mean standardized scale.  
271 The  $G$ -matrix can be mean standardized by dividing  $ij$ th element by the product of the means of  
272 traits  $i$  and  $j$ .  $G_\mu = G \oslash (\bar{z}\bar{z}^T)$ , where  $\bar{z}$  is a vector of trait means and  $\oslash$  symbol for element-  
273 wise division. The mean standardized selection gradient was calculated as  $\beta_\mu = \bar{z} \odot \beta$ , where  $\odot$   
274 is element-wise multiplication. Interval estimates for these statistics were obtained by calculating  
275 them for each posterior sample.

## 276 **Quantitative genetic model for the evolution of performance curves**

277 To examine how thermal performance curves of *N. crassa* can evolve, we used a quantitative genetic  
278 model with the empirically estimated  $G$ -matrix. Response to selection can be calculated using the  
279 multivariate breeder's equation

$$280 \quad \mathbf{R} = \mathbf{G}\mathbf{P}^{-1}\mathbf{S} \quad (12)$$

281 where  $\mathbf{S}$  is a vector of selection differentials for each temperature,  $\mathbf{G}$  and  $\mathbf{P}$  are the genetic and  
282 phenotypic variance-covariance matrices respectively, and  $\mathbf{R}$  is the response to selection. Response  
283 to selection can also be expressed in terms of the selection gradient,  $\beta$ , as

$$284 \quad \mathbf{R} = \mathbf{G}\beta \quad (13)$$



285 where  $\beta = \mathbf{P}^{-1}\mathbf{S}$ . The biological interpretation of selection differential and selection gradient are  
286 different, as selection differential of 0 for a given trait does not imply selective neutrality but rather  
287 stabilizing selection, whereas selection gradient of 0 for a trait implies that the trait is selectively  
288 neutral. See figure S3 for an illustration of the differences between these concepts. When we asked  
289 how would evolution proceed in a particular direction, we simulated response to selection using  
290 selection gradient (Equation 13). And when we asked whether selection could generate a particu-  
291 lar phenotype we simulated response to selection using selection differentials (Equation 12). Our  
292 goal is not to predict the evolution of tolerance curves in nature, as the real selection gradients are  
293 unknown and the assumption that  $\mathbf{G}$  remains constant is likely violated in real populations. In-  
294 deed, there are considerable difficulties in predicting the response to selection in nature (Morrissey  
295 et al., 2010). Instead, our goal is to illustrate how thermal performance curves could evolve in a  
296 population with a similar  $\mathbf{G}$  as estimated empirically here.

297 The phenotypic matrix was calculated from  $\mathbf{P} = \mathbf{G} + \mathbf{E}$ . The environmental variance-covariance  
298 matrix  $\mathbf{E}$ , which uses environmental standard deviations and their correlations analogous to equa-  
299 tion 9, was obtained from the same model fit as  $\mathbf{G}$ . Since there is uncertainty in our estimates  
300 of  $\mathbf{G}$  and  $\mathbf{E}$  we incorporated this uncertainty in the selection responses by sampling 1000  $\mathbf{G}$  and  
301  $\mathbf{E}$  matrices from the posterior distributions of genetic and environmental standard deviations and  
302 calculating a response to selection for each sample. We calculated responses to selection after  
303 1, 3, and 5 generations of selection, assuming that the selection differentials,  $\mathbf{G}$ , and  $\mathbf{E}$  ma-  
304 trices stay the same. We always normalized the sum of absolute values of selection differen-  
305 tials or gradients across all temperatures for different selection regimes. First we used selection  
306 gradients that corresponded to the first two eigenvectors of the  $\mathbf{G}$ -matrix. The summed abso-  
307 lute values of selection gradients or selection differentials across all temperatures were normal-  
308 ized to be 0.6 mm/h. We estimated evolvability and conditional evolvability along these gra-  
309 dients as explained above. Then we used different selection regimes to examine how we could  
310 change the performance curve elevation, optimum, or shape (Figure 1). We used six different  
311 vectors of  $\mathbf{S}$ :  $\mathbf{S}_1 = \{0.1, 0.1, 0.1, 0.1, 0.1, 0.1\}$  and  $\mathbf{S}_2 = \{-0.1, -0.1, -0.1, -0.1, -0.1, -0.1\}$ ,

312 which correspond to selection on elevation change;  $\mathbf{S}_3 = \{0, 0.1, 0.1, -0.2, -0.2, 0\}$  and  $\mathbf{S}_4 =$   
313  $\{0, -0.05, -0.05, -0.1, 0.2, 0.2\}$ , which correspond to a shift in optimum temperature;  $\mathbf{S}_5 =$   
314  $\{0.1, 0.2, 0, 0, 0.1, 0.2\}$  and  $\mathbf{S}_6 = \{0, -0.1, -0.25, 0.05, -0.1, -0.1\}$ , which correspond to change  
315 in reaction norm shape. The selection differentials were chosen so that they would produce the  
316 desired phenotypic change, choice of numerical values was otherwise arbitrary. For evolvability  
317 calculations, we calculated realized selection gradients based on these selection differentials as  
318  $\beta = \mathbf{P}^{-1}\mathbf{S}$ .

## 319 **Results**

### 320 **Growth of *Neurospora* at different temperatures**

321 Temperature had a large effect on growth, at 20 °C growth rate was between 2 and 2.5 mm/h  
322 (mean 2.17 and 95% HPD interval 2.15–2.20) for most strains, and as temperature increased up to  
323 35 °C growth rates rose to between 3 and 5 mm/h (mean 4.15 and 95% HPD interval 4.08–4.22)  
324 for most strains (Figure 2A). This represents an increase of 91% in mean growth rate. For many  
325 strains growth rate peaked at 35 °C and then decreased as temperature was increased (Figure 2A),  
326 at 40 °C mean growth rate was 2.35 (2.29–2.41 95% HPDI) mm/h. The performance curves of *N.*  
327 *crassa* exhibited a typical performance curve form: with an optimum temperature and decrease in  
328 growth rate in other temperatures, and performance declined faster in temperatures warmer than the  
329 optimum (Sinclair et al., 2016). Few genotypes grew very slowly and had unusual tolerance curve  
330 shapes (Figure 2A), possibly reflecting that these genotypes were poorly suited to lab conditions,  
331 due to specific nutritional requirements for example.

### 332 **Thermodynamics of thermal performance curves**

333 We examined whether differences between genotypes could be explained by a thermodynamic  
334 effect, i. e. does the maximum growth rate increase with optimum temperature. We obtained  $\mu_{max}$   
335 and  $T_{opt}$  from the natural spline fits and plotted  $\ln(\mu_{max})$  against  $1/(kT_{opt})$  (Figure 2B). For the

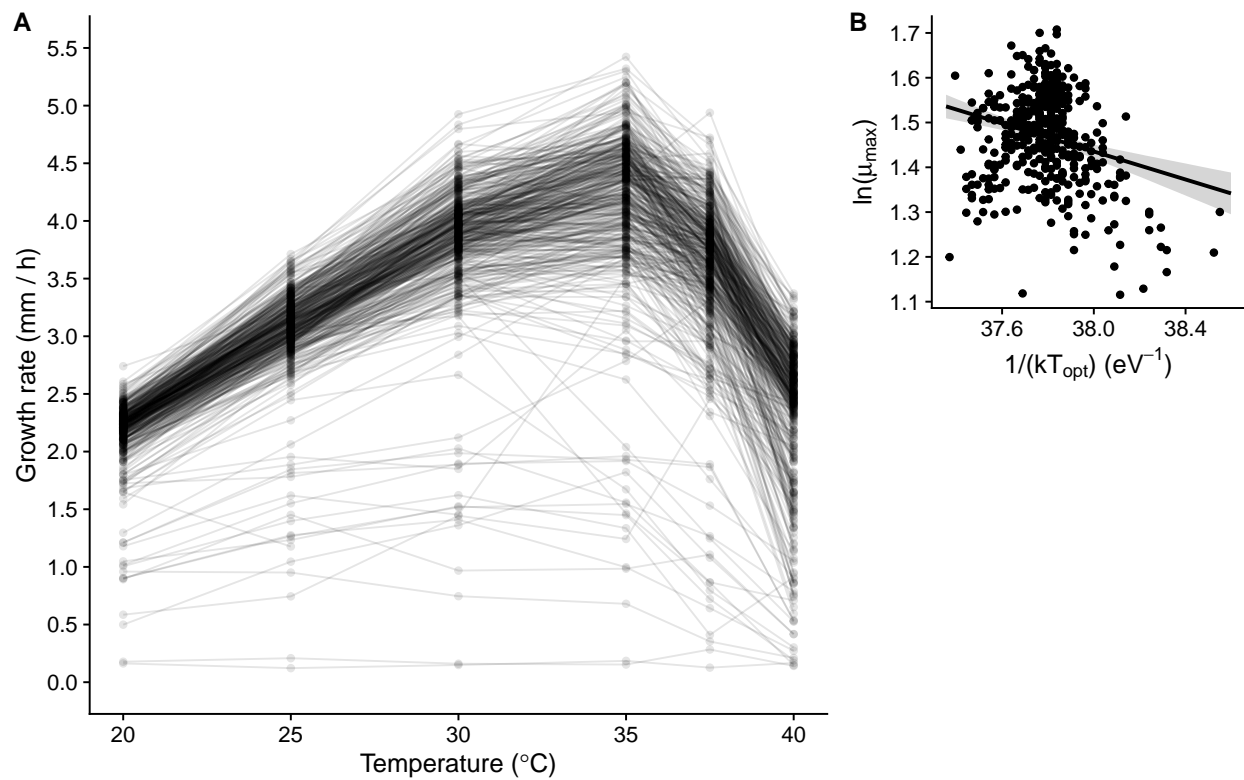

Figure 2: A) Phenotypic means for each genotype. B) Logarithm of maximum growth rate,  $\mu_{max}$ , plotted against inverse of  $kT_{opt}$ , where  $k$  is the Boltzmann's constant and  $T_{opt}$  the temperature where maximal growth rate occurs. The slope gives an estimate of negative activation energy  $-E$ .

336 bulk of the genotype data, the estimated slope was  $-0.16$  (95% HPD from  $-0.22$  to  $-0.10$ ), which  
337 corresponds to activation energy of  $0.16$  eV. This was lower than the theoretical expectation of  $0.6$   
338 eV. Moreover, there was substantial amount of variation around the regression line (Figure 2B);  
339 optimum temperature explains only a small proportion of the observed variation. This indicates  
340 that while a small thermodynamic effect exists, most variation within *N. crassa* is due to other  
341 physiological and biochemical causes. As this result was obtained in an analysis where we removed  
342 genotypes which had atypical reaction norms (Figure S1A), we also fitted a robust regression to the  
343 full data (Figure S1B) and obtained a slope of  $-0.17$  which is very close to our original estimate of  
344  $-0.16$ . While fitting an ordinary regression to the full data gives a somewhat smaller slope ( $-0.34$ ),  
345 the few atypical observations have high leverage in the model. Since results of robust regression  
346 and removing outliers agree, it seems that removing the outliers is quite reasonable in this case.

## 347 **Quantitative genetics**

348 In order to analyse the data without forcing the tolerance curves to fit any predetermined shape, or  
349 underlying latent structures as in Izem and Kingsolver (2005), we fit a multivariate model to the  
350 data where growth at each temperature was modelled as potentially correlated with growth at other  
351 temperatures. We obtained the **G**-matrix from the multivariate model fit (Equation 2). There was  
352 genetic variation for growth in all temperatures and all genetic covariances and correlations were  
353 positive (Table 1).

354 By plotting the model means and genetic correlations it appeared that genetic correlation be-  
355 tween adjacent temperatures was generally high, and decreased as temperatures were further apart  
356 and correlations involving  $40$  °C also seemed lower (Figure 3A). We tested this idea formally  
357 and fitted a model of genetic correlations and temperature differences. We compared the differ-  
358 ent models, and the best model had different intercepts for correlations involving  $40$  °C and for  
359 correlations not involving  $40$  °C, and identical slopes for these two groups (Table 2). A model  
360 with both different slopes and different intercepts had marginal weight in the model comparison  
361 but the  $\beta_{40}$  parameter had an estimate overlapping with zero, so this model gave the same results as

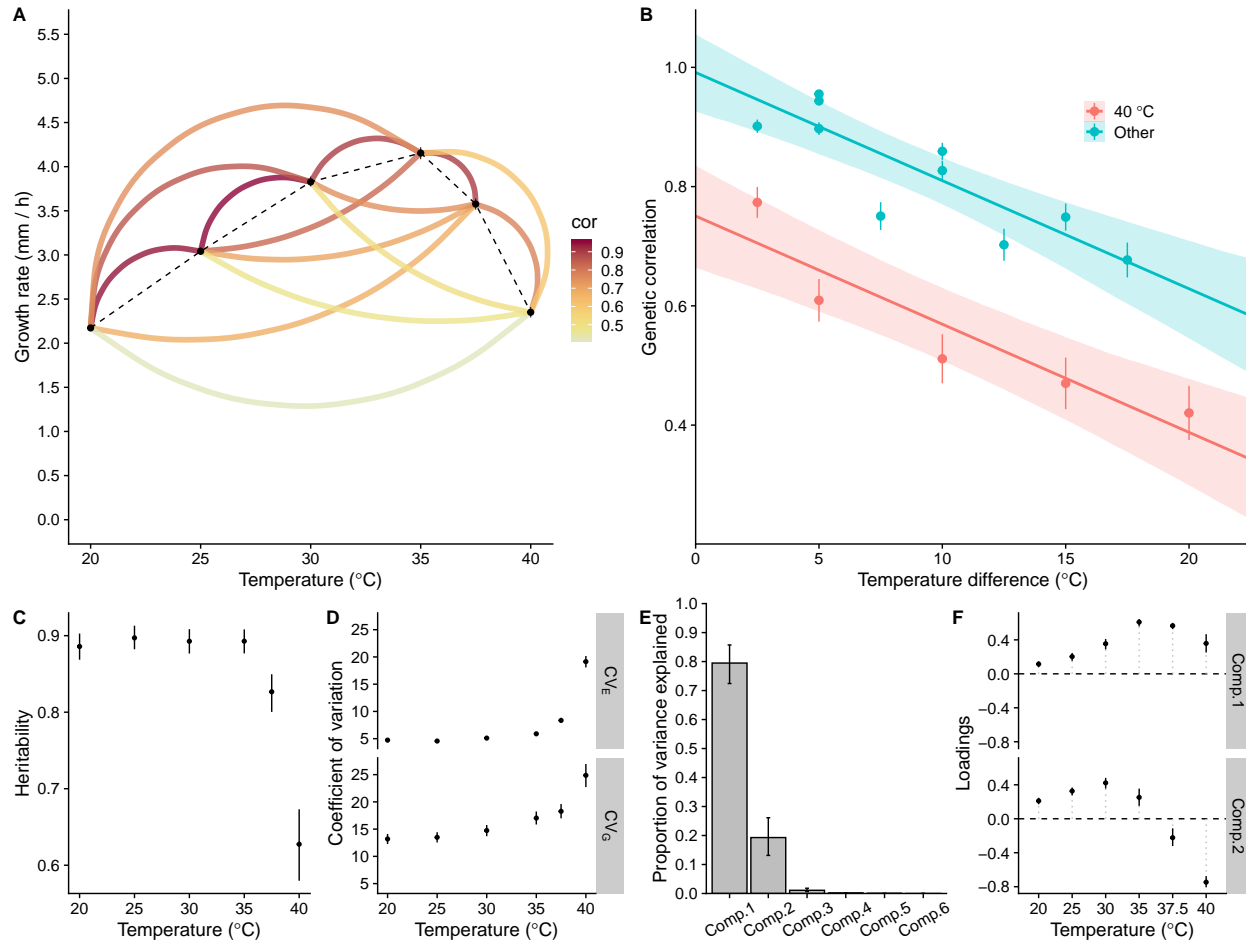

Figure 3: A) Model means and genetic correlations for each temperature. Arcs connect each pair of temperatures and arc color corresponds to the strength of their genetic correlation. B) Genetic correlations against temperature differences. Line is the mean slope of the model and envelope the 95% HPD interval for the slope. C) Heritabilities of growth rate at each temperature, means and 95% HPD intervals. D) Coefficients of genetic and environmental variation for each temperature, means and 95% HPD intervals. Note that points obscure small error bars. E) Principle component analysis of the G-matrix: proportions of variance explained by the different components. Error bars are 95% HPD intervals. F) Loadings of components 1 and 2 for each temperature. Error bars are 95% HPD intervals.

362 the simpler model and thus we report results only from the different intercepts model. The model  
363 confirmed our observation that the genetic correlation between any two temperatures was indeed  
364 lower if one of those temperatures was 40 °C (Figure 3B), the intercept effect  $\alpha_{40}$  had an estimate  
365 of  $-0.24$  (with a 95% HPDI from  $-0.31$  to  $-0.17$ ). The genetic correlation of growth rates in two  
366 temperatures decreased by 0.02 (0.02–0.01 95% HPDI) units as temperature difference increased  
367 by 1 °C. This result suggested that variation in different genes contributes to genetic variation for  
368 growth at 40 °C than in lower temperatures.

369 Most of the variation observed in growth rates was due to genetic variation present among the  
370 strains. Heritabilities for growth at different temperatures were high, around 0.89 for temperatures  
371 from 20 to 35 °C (Figure 3C). As temperature increased further heritability dropped to 0.63 at 40  
372 °C (Figure 3C). However, this lower heritability was not due to decreased genetic variation but  
373 increased environmental variance at 37.5 and 40 °C (Table 1). Therefore there was substantial  
374 genetic variation for growth rate at 40 °C but environmental variation increased as well; looking  
375 at heritability alone would have been misleading in this case. Furthermore, as trait means differ  
376 across the different temperatures looking at genetic variances alone would have suggested that 35  
377 °C has the most genetic variance (Table 1), but this would have been also misleading as coefficient  
378 of genetic variation reveals that growth at 40 °C has the most genetic variation followed by the other  
379 temperatures in decreasing order (Figure 3D). The same was true for coefficient of environmental  
380 variation (Figure 3D).

381 Eigen decomposition of the  $\mathbf{G}$ -matrix can reveal what are the main axes along which correlated  
382 traits most readily evolve. We used principle component analysis to decompose the  $\mathbf{G}$ -matrix. The  
383 first two principle components explained most of the variance with the first component explaining  
384 79.5% (72.4%–86.0%) and the second component 19.3% (13.1%–26.6%) of the variance (Figure  
385 3E). The rest of the components explained the remaining 1.2% of the variance, but the sizes of  
386 their corresponding eigenvalues were so small that this 1.2% is unlikely to have any biological  
387 meaning. Moreover, the interval estimates for the loadings of components 1 and 2 were consistent  
388 with no sign changes (Figure 3F), but this was not the case for rest of the components, indicating

389 that loadings for the rest of the components are very uncertain. All the loadings of the first principle  
390 component were positive (Figure 3F), indicating that most variation in tolerance curves is mainly  
391 for elevation. The second component suggested that growth rate at 40 °C and to lesser extent at 37.5  
392 °C are more independent from rest of the temperatures, even though some variation is shared with  
393 40 °C and the rest of the temperatures, as genetic correlation with 40 °C and the other temperatures  
394 were positive (Table 1).

395 When looking trait specific evolvabilities we also observed that growth rate at 40 °C had the  
396 highest conditional evolvability and the highest autonomy (Table 3). This indicates that out of all  
397 of the growth rates, growth rate at 40 °C can evolve by itself most easily. The rest of the traits had  
398 very low autonomies reflecting their high genetic correlations (Tables 1 and 3).

## 399 **Evolution of performance curves**

400 In order to examine how a performance curve of a population that has the same **G**-matrix as es-  
401 timated here could evolve, we performed simulations with a quantitative genetic model of perfor-  
402 mance curve evolution. First we asked how performance curves responded to selection if selection  
403 were to operate in the same direction as the two first observed loadings of the **G**-matrix eigen de-  
404 composition (Figure 3F). We normalized the summed absolute values of selection gradients across  
405 all temperatures to be 0.6 mm/h and their relative weights to be proportional to the loadings of  
406 each principle component. Theoretical prediction is that when  $\beta$  is in the same direction as the first  
407 component, evolvability should be the greatest (Schluter, 1996). Indeed, this is what we observed,  
408 as consequently response to selection was also greatest in this direction (Figure 4). Moreover,  
409 evolvability and conditional evolvability greatly surpassed the average evolvability across the en-  
410 tire phenotypic space (Figure 4D). When selection gradient pointed to the direction of the second  
411 component, unconditional evolvability was no longer larger than expected, while conditional evol-  
412 vability still remained larger than average (Figure 4D).

413 Next we examined responses to different selection differentials with the idea that we want to  
414 know whether particular phenotypic change in the performance curve was possible, whatever the

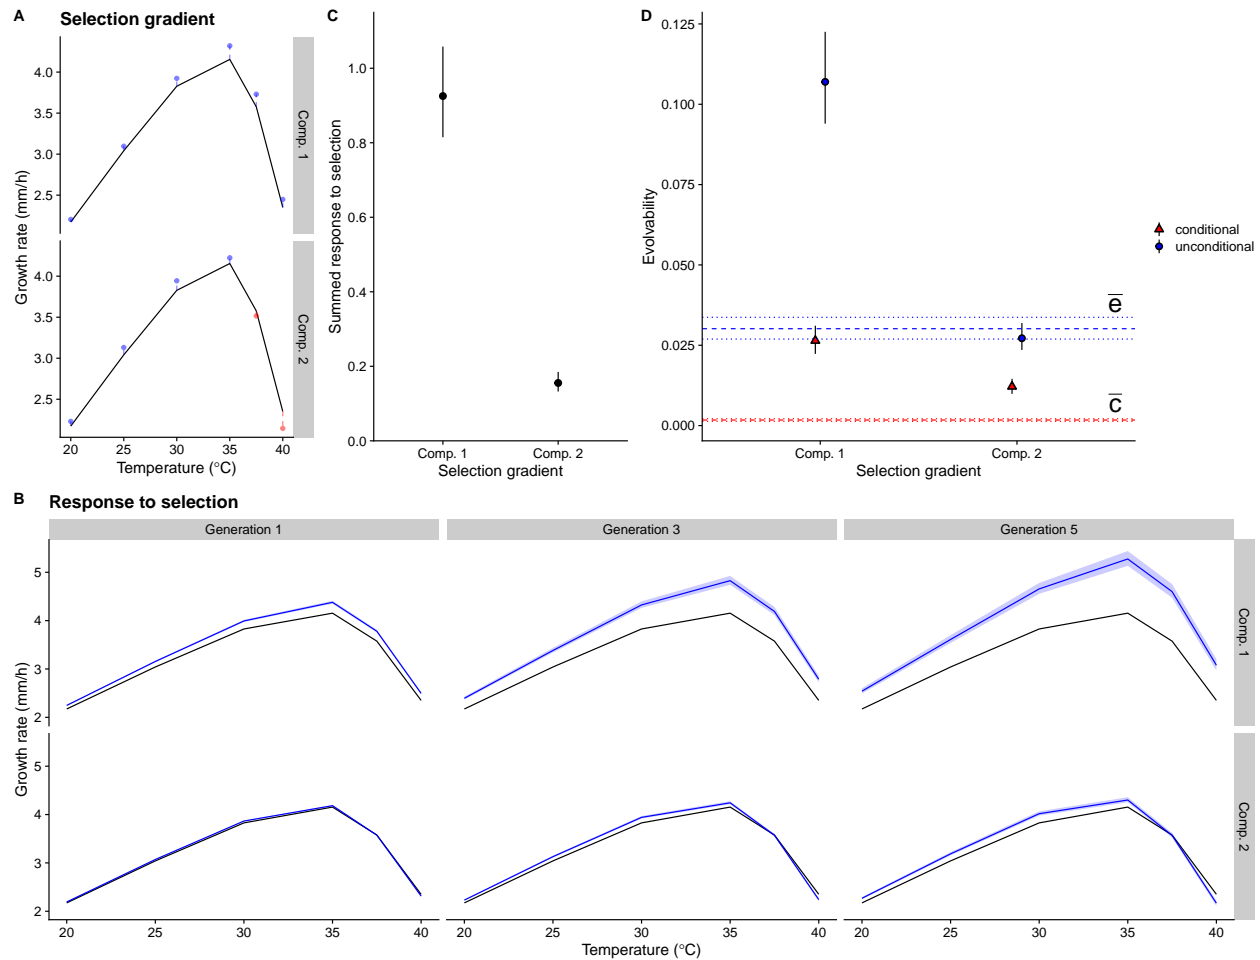

Figure 4: Simulated responses to selection using selection gradient,  $\beta$ . A) Selection gradients correspond to the loadings of the first two components of the  $G$ -matrix eigen decomposition. Black line is the mean empirical performance curve and dots represent values of selection gradient for each temperature. Blue dots represent selection for increased growth and red dots for decreased growth. B) Simulated responses to selection, black line is the empirical mean and blue lines are the simulated performance curves after selection. Shaded regions contain 95% of the simulations. Note that variability due to uncertainty in the  $G$ -matrix is not visible for many of the simulations. Columns show selection responses after 1, 3, or 5 generations of selection and rows show results for different selection regimes. C) Summed absolute values for response to selection in a single generation for the two gradients. D) Medians and 95% intervals for mean standardized evolvabilities for the two gradients, blue horizontal lines ( $\bar{e}$ ) show the average unconditional evolvability across random selection gradients and red horizontal lines ( $\bar{c}$ ) show the average conditional evolvability, dotted lines show the 95% HPD interval.



415 selection gradient implied by the selection differentials. For instance, when we simulated selection  
416 for increased growth at a single temperature this leads to positive correlated responses in other  
417 temperatures if the other traits are neutral, as in the case when selection gradient is zero for a  
418 given trait. However, when there was selection for increased growth at a single temperature and  
419 to maintain the original phenotype at the other temperatures there were also correlated responses  
420 but these were less uniform (Figure S3). Accordingly, selection at a single temperature often lead  
421 to correlated responses in nearby temperatures (Figure S4). Selection at multiple temperatures  
422 lead to stronger responses to selection and correlated responses (Figures S5 and S6). For instance,  
423 selection at 25 and 30 °C increased growth rate also at 20 °C (Figure S5). When selection happened  
424 at multiple temperatures, response could be bigger in certain temperature than if selection happened  
425 for that temperature alone. For example, if there was selection for higher growth at 20, 25, and 30  
426 °C, response to selection was greater than if there was selection for higher growth only at 20 °C  
427 (Figure S4 and S6). With selection differential of 0.2 only at 20 °C, response to selection after five  
428 generations was 2.80 (2.75–2.84, 95% HPD). Whereas if selection differential was 0.2 at 20, 25,  
429 and 30 °C, response to selection after 5 generations of selection was 3.01 (2.98–3.04, 95% HPD).  
430 Thus, it was not possible to change a certain temperature completely independently of the others,  
431 but often extreme temperatures could be changed without affecting the growth at the other extreme.

432 We then asked is it possible to create similar evolutionary responses in performance curves as  
433 shown in Figure 1. We were able to find a set of selection differentials that were able to generate  
434 changes in elevation, horizontal shift, or shape (Figure 5). This shows that despite strong genetic  
435 correlations it is possible for the performance curves to evolve in almost any manner if selection  
436 favors such a performance curve. However, selection regimes involving horizontal shifts require  
437 selection for increased growth rate in some temperatures and decreased growth rate in others (Fig-  
438 ure 5). Evolvabilities and conditional evolvabilities were highest for elevation changes. For opti-  
439 mum shifts and shape changes conditional evolvabilites were lower than the average conditional  
440 evolvability over all phenotypic space (Figure 5C). This indicates that elevation changes are less  
441 constrained than changes in optimum temperature or performance curve shape.

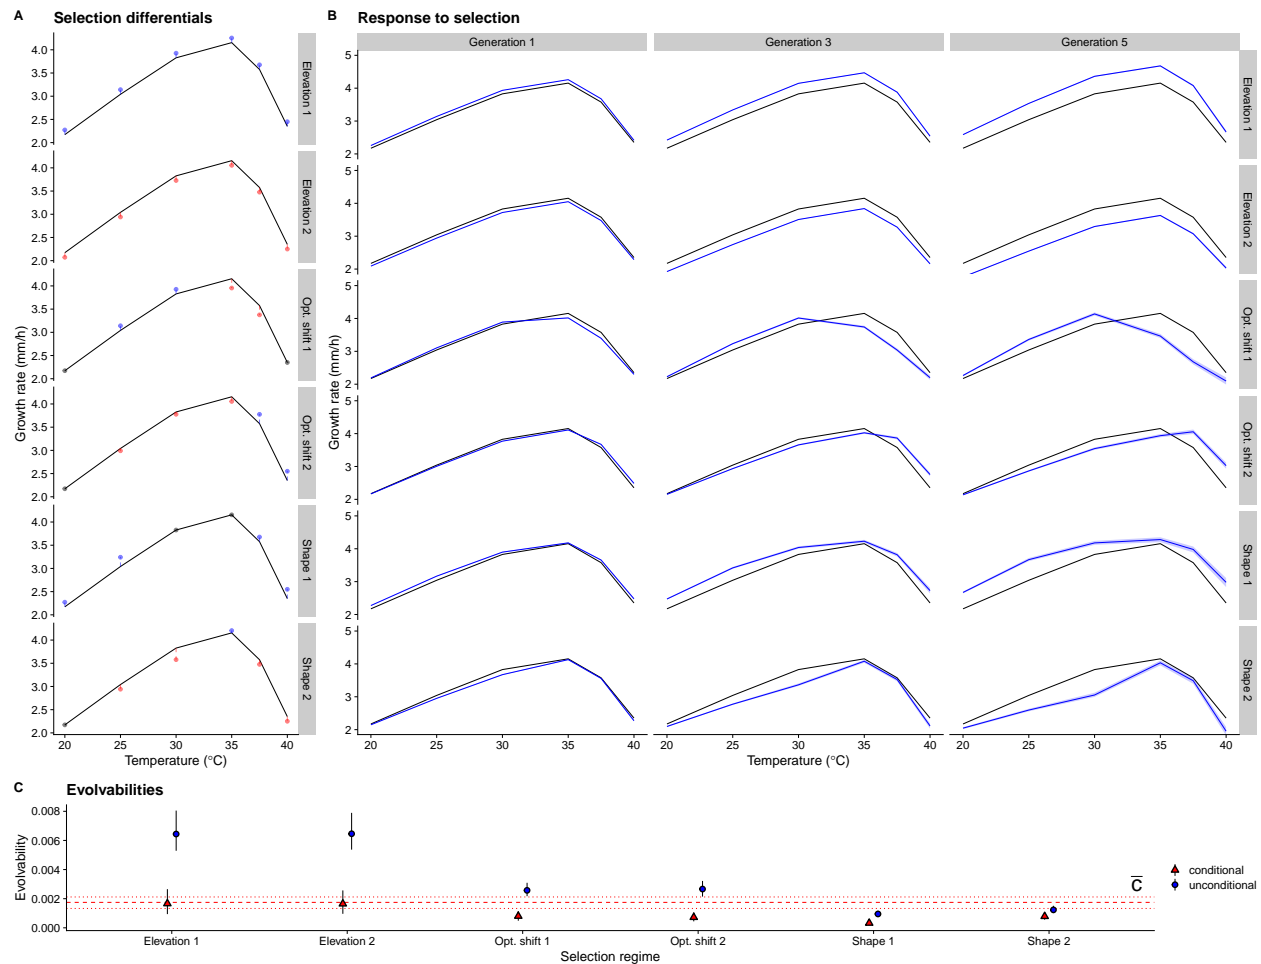

Figure 5: Simulated responses to selection using selection differentials, S. A) Selection differentials for each selection regime. Black line is the mean empirical performance curve and dots represent values of selection differentials for each temperature. Blue dots represent selection for increased growth, red for decreased growth and black dots indicate stabilizing selection at this temperature. Selection regime 1 selects for increased elevation, regime 2 selects for decreased elevation, regime 3 selects for lower optimum temperature, regime 4 selects for higher optimum, regime 5 selects for broader shape, and regime 6 selects for narrower shape. B) Simulated responses to selection. C) Evolvability and conditional evolvability for each of the selection gradients implied by the selection differentials. Red horizontal lines show the average conditional evolvability ( $\bar{c}$ ) across the entire phenotypic space. Average evolvability is higher than the y-axis scale and is not shown.

## 442 Discussion

443 We have shown that there is substantial genetic variation in thermal performance curves of *Neu-*  
444 *rospora crassa*. Most of this variation is in performance curve elevation and there is very little  
445 evidence of strong trade-offs. Genetic variation in growth is strongly correlated among nearby  
446 temperatures but there is a threshold before or at 40 °C after which this correlation drops, indi-  
447 cating that physiological processes at 40 °C are different than those at lower temperatures. Such  
448 thresholds are common in many organisms, including *Drosophila* where different expression pro-  
449 files were observed in cold, moderate, and hot temperatures (Colinet et al., 2013).

450 In many ways, variation in performance curves of *N. crassa* are quite typical for many ec-  
451 totherms that have been studied (Sinclair et al., 2016). Most genetic variation in *N. crassa* is vari-  
452 ation in performance curve elevation, which contrasts with previous studies in other species that  
453 have found most variation to be for reaction norm shapes (Izem and Kingsolver, 2005; Logan et al.,  
454 2020). Yet variation in performance curve elevation is commonly found, a review of thermal per-  
455 formance curves in insects found that elevation shifts were the most common type of change along  
456 environmental gradients (Tüzün and Stoks, 2018), see also Scheiner (1993). We also observed quite  
457 substantial genetic variation in thermal performance, and while comparisons between animals and  
458 fungi should be treated with caution, other studies have observed much lower heritabilities (e.g.  
459 Logan et al., 2018; Castañeda et al., 2019; Martins et al., 2019).

460 Genetic variation in performance curve elevation could reflect differences in genetic condition  
461 of individuals, rather than temperature specific adaptation. This could be due to different strains  
462 harboring different amounts of deleterious mutations. However, this seems an unlikely explanation  
463 as *N. crassa* is haploid, so deleterious mutations are immediately exposed to selection and would be  
464 removed, as in nature there is plenty of sexual reproduction as indicated by rapid decay of linkage  
465 disequilibrium in the population genetic data (Ellison et al., 2011; Palma-Guerrero et al., 2013).  
466 Another possibility is that genetic differences between the strains in how well they are able to  
467 grow in lab conditions are thermodynamically amplified, as increasing temperature also increases  
468 metabolic rate (Schulte, 2015). However, our estimates of activation energy were much lower than

469 the thermodynamic expectation, and contrast with previous studies that have found much stronger  
470 relationship between growth rate and optimum temperatures (Savage et al., 2004; Knies et al.,  
471 2009; Sørensen et al., 2018). While we cannot exclude that some of the differences were due to  
472 the thermodynamic effect, this cannot be the whole explanation as there were clear genotype by  
473 environment interactions indicated by genetic correlations across environments that were less than  
474 one. There have to be alleles segregating in the population that have different effects in different  
475 temperatures. Particularly, genetic variation after the optimum of the thermal performance curve  
476 has been reached cannot be accounted by thermodynamic effects (Schulte, 2015).

477 There was no indication of strong trade-offs between temperatures, and certainly not the kind  
478 of trade-offs that have been assumed in many models of tolerance curve or reaction norm evolution  
479 in general (Angilletta et al., 2003). The absence of any trade-offs suggests that theoretical models  
480 of reaction norm evolution that assume trade-offs should be treated with caution. It further poses  
481 a question: if growth rate is closely linked to fitness, and if there are no trade-offs, why there  
482 is genetic variation in growth? It seems reasonable that mycelial growth rate should be a fitness  
483 component in filamentous fungi. In a previous study no trade-off was detected between mycelial  
484 growth rate and spore production (Anderson et al., 2018). However, there is some evidence that  
485 strains that have higher growth rates have also higher competitive fitness (Kronholm et al., 2020).  
486 It may be that there is a trade-off between growth rate and some other trait which we have not  
487 measured, for example Ketola et al. (2013) found a trade-off between bacterial virulence and growth  
488 in high temperatures. Alternatively, the evolution of performance curves may be limited by the  
489 environments, and thus the selection pressures, the strains encounter rather than genetic trade-  
490 offs (Whitlock, 1996; Kassen, 2002). If there is no selection at a particular temperature, then  
491 variation at those temperatures may be neutral. The evidence for trade-offs and cost of plasticity for  
492 temperatures has been mixed; some studies have observed trade-offs (Knies et al., 2006; Romero-  
493 Olivares et al., 2015; Le Vinh Thuy et al., 2016), while others have observed that adapting to  
494 one temperature did not limit plasticity (Fragata et al., 2016; Manenti et al., 2015), most genetic  
495 variation has been observed for overall performance (Klepsatel et al., 2013; Latimer et al., 2015), or

496 that adaptation was largely temperature specific with no apparent trade-offs (Bennett et al., 1992).

497 Genetic correlations between growth rates at nearby temperatures were strong, which is to be  
498 expected, as a difference of a few °C is likely to be a very similar physical environment for an  
499 organism. However, growth rate at 40 °C had a lower genetic correlation to growth rates at other  
500 temperatures. This suggests that at 40 °C there was some physiological process activated, which  
501 has genetic variation, but that was not active or was at much lower level of activity in lower tem-  
502 peratures. The most obvious candidate for such a process is the heat shock response (Piper, 1993;  
503 Feder and Hofmann, 1999; Sørensen et al., 2003). Previously the heat shock response of *N. crassa*  
504 has been studied at 42 °C or higher (Mohsenzadeh et al., 1998; Plesofsky-Vig and Brambl, 1985;  
505 Guy et al., 1986) but it probably occurs already at lower temperatures, as we observed significant  
506 slow down of growth at 40 °C. The canonical heat shock proteins are important for the physio-  
507 logical heat shock response, but there can be additional mechanisms involved: there is evidence  
508 that the sugar trehalose plays some role in *N. crassa* heat shock response (Bonini et al., 1995).  
509 Furthermore, changes in cell membrane composition are involved in temperature acclimation and  
510 the proportion of highly unsaturated fats increases in low temperatures (Martin et al., 1981). These  
511 responses have been observed in yeasts as well (Glatz et al., 2015). It is likely that there is ge-  
512 netic variation in the heat shock response induction threshold or in the magnitude of heat shock  
513 response, and this physiological variation can explain why genetic correlation across temperatures  
514 is lower when 40 °C is involved. Further investigation into variation of heat shock responses at the  
515 physiological level seems warranted.

## 516 **Conclusions**

517 At the species level, populations of *N. crassa* contain plenty of genetic variation for growth at dif-  
518 ferent temperatures, and may be able to respond to increasing temperatures and thermal fluctuations  
519 via genetic adaptation mainly by increasing overall performance. An experimental evolution study  
520 with a related species, *N. discreta*, also found adaptation to higher temperature (Romero-Olivares  
521 et al., 2015). Previous studies have suggested that warming may pose the greatest risk to tropical

522 animal species, as they live already close to their thermal maxima (Deutsch et al., 2008), but *N.*  
523 *crassa* is different in this respect. Whether this is true for all fungi or if *N. crassa* is a special case  
524 remains to be investigated.

525 We did not observe any inherent genetic trade-off between hotter and colder temperatures,  
526 which is in contrast to common theoretical assumptions. Thermal performance curves of *N. crassa*  
527 can in theory evolve to have nearly any shape provided that appropriate selection gradient exists.  
528 Whether such selection gradients occur in nature is another matter. However, it seems more plau-  
529 sible that if there would be selection for increased growth at higher temperatures, evolutionary  
530 response will happen by either increasing the overall elevation of the performance curve, which  
531 was the line of least genetic resistance.

532 Revealing the genetic basis of performance curve variation is a topic for future studies, and  
533 would allow investigating whether trade-offs exists at the level of specific alleles. We are pursuing  
534 this question in future work.

## 535 **Literature cited**

536 Anderson, J. L., B. P. S. Nieuwenhuis, and H. Johannesson, 2018. Asexual reproduction and  
537 growth rate: independent and plastic life history traits in *Neurospora crassa*. *The ISME Journal*  
538 13:780–788. URL <https://doi.org/10.1038/s41396-018-0294-7>.

539 Angilletta, M. J., R. S. Wilson, C. A. Navas, and R. S. James, 2003. Tradeoffs and the  
540 evolution of thermal reaction norms. *Trends in Ecology & Evolution* 18:234 – 240. URL  
541 <http://www.sciencedirect.com/science/article/pii/S0169534703000879>.

542 Araújo, M. B., F. Ferri-Yáñez, F. Bozinovic, P. A. Marquet, F. Valladares, and S. L.  
543 Chown, 2013. Heat freezes niche evolution. *Ecology Letters* 16:1206–1219. URL  
544 <http://dx.doi.org/10.1111/ele.12155>.

545 Arcus, V. L., E. J. Prentice, J. K. Hobbs, A. J. Mulholland, M. W. Van der  
546 Kamp, C. R. Pudney, E. J. Parker, and L. A. Schipper, 2016. On the tem-

- 547 perature dependence of enzyme-catalyzed rates. *Biochemistry* 55:1681–1688. URL  
548 <https://doi.org/10.1021/acs.biochem.5b01094>.
- 549 Ashrafi, R., M. Bruneaux, L.-R. Sundberg, K. Pulkkinen, J. Valkonen, and T. Ke-  
550 tola, 2018. Broad thermal tolerance is negatively correlated with virulence in an  
551 opportunistic bacterial pathogen. *Evolutionary Applications* 11:1700–1714. URL  
552 <https://onlinelibrary.wiley.com/doi/abs/10.1111/eva.12673>.
- 553 Bennett, A. F., R. E. Lenski, and J. E. Mittler, 1992. Evolutionary adaptation to temperature. i.  
554 fitness responses of *Escherichia coli* to changes in its thermal environment. *Evolution* 46:16–30.
- 555 Bonini, B. M., M. J. Neves, J. A. Jorge, and H. F. Terenzi, 1995. Effects of temperature shifts on the  
556 metabolism of trehalose in *Neurospora crassa* wild type and a trehalase-deficient (*tre*) mutant.  
557 Evidence against the participation of periplasmic trehalase in the catabolism of intracellular  
558 trehalose. *Biochimica et Biophysica Acta (BBA) - General Subjects* 1245:339 – 347. URL  
559 <http://www.sciencedirect.com/science/article/pii/0304416595000984>.
- 560 Bürkner, P.-C., 2018. Advanced Bayesian Multilevel Modeling with the R Package brms. *The R*  
561 *Journal* 10:395–411. URL <https://doi.org/10.32614/RJ-2018-017>.
- 562 Carpenter, B., A. Gelman, M. Hoffman, D. Lee, B. Goodrich, M. Betancourt, M. Brubaker, J. Guo,  
563 P. Li, and A. Riddell, 2017. Stan: A probabilistic programming language. *Journal of Statistical*  
564 *Software* 76:1–32. URL <https://www.jstatsoft.org/v076/i01>.
- 565 Castañeda, L. E., V. Romero-Soriano, A. Mesas, D. A. Roff, and M. San-  
566 tos, 2019. Evolutionary potential of thermal preference and heat tolerance in  
567 *Drosophila subobscura*. *Journal of Evolutionary Biology* 32:818–824. URL  
568 <https://onlinelibrary.wiley.com/doi/abs/10.1111/jeb.13483>.
- 569 Colinet, H., J. Overgaard, E. Com, and J. G. Sørensen, 2013. Pro-  
570 teomic profiling of thermal acclimation in *Drosophila melanogaster*. In-

- 571 sect Biochemistry and Molecular Biology 43:352 – 365. URL  
572 <http://www.sciencedirect.com/science/article/pii/S0965174813000155>.
- 573 Davies, J. and D. Davies, 2010. Origins and evolution of antibiotic resis-  
574 tance. Microbiology and molecular biology reviews 74:417–433. URL  
575 <https://www.ncbi.nlm.nih.gov/pubmed/20805405>.
- 576 Davis, R. H. and F. J. de Serres, 1970. Genetic and microbiological research techniques for *Neu-*  
577 *rospora crassa*. Methods in Enzymology 17:79–143.
- 578 Deutsch, C. A., J. J. Tewksbury, R. B. Huey, K. S. Sheldon, C. K. Ghalambor, D. C.  
579 Haak, and P. R. Martin, 2008. Impacts of climate warming on terrestrial ectotherms  
580 across latitude. Proceedings of the National Academy of Sciences 105:6668–6672. URL  
581 <http://www.pnas.org/content/105/18/6668.abstract>.
- 582 Dillon, M. E., G. Wang, and R. B. Huey, 2010. Global metabolic impacts of recent climate warm-  
583 ing. Nature 467:704–706. URL <https://doi.org/10.1038/nature09407>.
- 584 Ellison, C. E., C. Hall, D. Kowbel, J. Welch, R. B. Brem, N. L. Glass, and J. W. Taylor, 2011.  
585 Population genomics and local adaptation in wild isolates of a model microbial eukaryote. Pro-  
586 ceedings of the National Academy of Sciences 108:2831–2836.
- 587 Feder, M. E. and G. E. Hofmann, 1999. Heat-shock proteins, molecular chaperones, and the stress  
588 response: Evolutionary and ecological physiology. Annual Review of Physiology 61:243–282.  
589 URL <http://dx.doi.org/10.1146/annurev.physiol.61.1.243>.
- 590 Fragata, I., M. Lopes-Cunha, M. Bárbaro, B. Kellen, M. Lima, G. S. Faria, S. G. Seabra,  
591 M. Santos, P. Simões, and M. Matos, 2016. Keeping your options open: Maintenance of  
592 thermal plasticity during adaptation to a stable environment. Evolution 70:195–206. URL  
593 <http://dx.doi.org/10.1111/evo.12828>.



- 594 Glatz, A., A.-M. Pilbat, G. L. Németh, K. Vince-Kontár, K. Jósvay, A. Hunya, A. Ud-  
595 vardy, I. Gombos, M. Péter, G. Balogh, I. Horváth, L. Vígh, and Z. Török, 2015. In-  
596 volvement of small heat shock proteins, trehalose, and lipids in the thermal stress man-  
597 agement in *Schizosaccharomyces pombe*. *Cell Stress & Chaperones* 21:327–338. URL  
598 <http://www.ncbi.nlm.nih.gov/pmc/articles/PMC4786532/>.
- 599 Gunderson, A. R. and J. H. Stillman, 2015. Plasticity in thermal tolerance has limited potential  
600 to buffer ectotherms from global warming. *Proceedings of the Royal Society of London B:*  
601 *Biological Sciences* 282:20150401.
- 602 Guy, C. L., N. Plesofsky-Vig, and R. Brambl, 1986. Heat shock protects germinating conid-  
603 iospores of *Neurospora crassa* against freezing injury. *Journal of Bacteriology* 167:124–129.  
604 URL <http://jeb.asm.org/content/167/1/124.abstract>.
- 605 Hansen, T. F. and D. Houle, 2008. Measuring and comparing evolvability and con-  
606 straint in multivariate characters. *Journal of Evolutionary Biology* 21:1201–1219. URL  
607 <https://onlinelibrary.wiley.com/doi/abs/10.1111/j.1420-9101.2008.01573.x>.
- 608 Hill, W. G., M. E. Goddard, and P. M. Visscher, 2008. Data and theory point to mainly additive  
609 genetic variance for complex traits. *PLoS Genetics* 4:e1000008.
- 610 Hochachka, P. W. and G. N. Somero, 2002. *Biochemical adaptation*. Oxford University Press, Inc.,  
611 New York.
- 612 Houle, D., 1992. Comparing evolvability and variability of quantitative traits. *Genetics* 130:195–  
613 204.
- 614 Huey, R. B. and J. G. Kingsolver, 1989. Evolution of thermal sensitivity of ec-  
615 totherm performance. *Trends in Ecology & Evolution* 4:131 – 135. URL  
616 <http://www.sciencedirect.com/science/article/pii/0169534789902115>.
- 617 ———, 1993. Evolution of resistance to high temperature in ectotherms. *The American Naturalist*  
618 142:S21–S46. URL <http://www.jstor.org/stable/2462707>.

- 619 IPCC, 2013. Summary for Policymakers, book section SPM, P. 1–30. Cambridge  
620 University Press, Cambridge, United Kingdom and New York, NY, USA. URL  
621 [www.climatechange2013.org](http://www.climatechange2013.org).
- 622 Izem, R. and J. Kingsolver, 2005. Variation in continuous reaction norms: Quantify-  
623 ing directions of biological interest. *The American Naturalist* 166:277–289. URL  
624 <https://doi.org/10.1086/431314>. PMID: 16032579.
- 625 Jacobson, D. J., J. R. Dettman, R. I. Adams, C. Boesl, S. Sultana, T. Roenneberg, M. Merrow,  
626 M. Duarte, I. Marques, A. Ushakova, P. Carneiro, A. Videira, L. Navarro-Sampedro, M. Olmedo,  
627 L. M. Corrochano, and J. W. Taylor, 2006. New findings of *Neurospora* in Europe and compar-  
628 isons of diversity in temperate climates on continental scales. *Mycologia* 98:550–559. URL  
629 <http://www.mycologia.org/content/98/4/550.abstract>.
- 630 Kassen, R., 2002. The experimental evolution of specialists, generalists, and the  
631 maintenance of diversity. *Journal of Evolutionary Biology* 15:173–190. URL  
632 <https://onlinelibrary.wiley.com/doi/abs/10.1046/j.1420-9101.2002.00377.x>.
- 633 Ketola, T., L. Mikonranta, J. Zhang, K. Saarinen, A.-M. Örmälä, V.-P. Friman, J. Mappes, and  
634 J. Laakso, 2013. Fluctuating temperature leads to evolution of thermal generalism and preadap-  
635 tation to novel environments. *Evolution* 67:2936–2944.
- 636 Ketola, T. and K. Saarinen, 2015. Experimental evolution in fluctuating environments:  
637 Tolerance measurements at constant temperatures incorrectly predict the ability to tol-  
638 erate fluctuating temperatures. *Journal of Evolutionary Biology* 28:800–806. URL  
639 <http://dx.doi.org/10.1111/jeb.12606>.
- 640 Klepsatel, P., M. Gálíková, N. De Maio, C. D. Huber, C. Schlötterer, and  
641 T. Flatt, 2013. Variation in thermal performance and reaction norms among  
642 populations of *Drosophila melanogaster*. *Evolution* 67:3573–3587. URL  
643 <https://onlinelibrary.wiley.com/doi/abs/10.1111/evo.12221>.

- 644 Knies, J. L., R. Izem, K. L. Supler, J. G. Kingsolver, and C. L. Burch, 2006. The genetic basis of  
645 thermal reaction norm evolution in lab and natural phage populations. *PLOS Biology* 4. URL  
646 <https://doi.org/10.1371/journal.pbio.0040201>.
- 647 Knies, J. L., J. G. Kingsolver, and C. L. Burch, 2009. Hotter is better and broader: Thermal  
648 sensitivity of fitness in a population of bacteriophages. *The American Naturalist* 173:419–430.  
649 URL <https://doi.org/10.1086/597224>.
- 650 Krenek, S., T. U. Berendonk, and T. Petzoldt, 2011. Thermal performance curves of *Paramecium*  
651 *caudatum*: A model selection approach. *European Journal of Protistology* 47:124 – 137. URL  
652 <http://www.sciencedirect.com/science/article/pii/S0932473910000878>.
- 653 Kronholm, I., H. Johannesson, and T. Ketola, 2016. Epigenetic control of phenotypic plasticity  
654 in the filamentous fungus *Neurospora crassa*. *G3: Genes|Genomes|Genetics* 6:4009–4022. URL  
655 <http://www.g3journal.org/content/early/2016/09/29/g3.116.033860.abstract>.
- 656 Kronholm, I., T. Ormsby, K. J. McNaught, E. U. Selker, and T. Ketola, 2020. Marked *Neurospora*  
657 *crassa* strains for competition experiments and Bayesian methods for fitness estimates. *G3:*  
658 *Genes|Genomes|Genetics* 10:1261–1270.
- 659 Latimer, C. A. L., B. R. Foley, and S. F. Chenoweth, 2015. Connect-  
660 ing thermal performance curve variation to the genotype: a multivari-  
661 ate QTL approach. *Journal of Evolutionary Biology* 28:155–168. URL  
662 <https://onlinelibrary.wiley.com/doi/abs/10.1111/jeb.12552>.
- 663 Le Vinh Thuy, J., J. M. VandenBrooks, and M. J. Angilletta, 2016. Devel-  
664 opmental plasticity evolved according to specialist–generalist trade-offs in experimen-  
665 tal populations of *Drosophila melanogaster*. *Biology Letters* 12:20160379. URL  
666 <http://rsbl.royalsocietypublishing.org/content/12/7/20160379>.
- 667 Logan, M. L., J. D. Curlis, A. L. Gilbert, D. B. Miles, A. K. Chung, J. W. Mc-  
668 Glothlin, and R. M. Cox, 2018. Thermal physiology and thermoregulatory be-

- 669    haviour exhibit low heritability despite genetic divergence between lizard popula-  
670    tions. *Proceedings of the Royal Society B: Biological Sciences* 285:20180697. URL  
671    <https://royalsocietypublishing.org/doi/abs/10.1098/rspb.2018.0697>.
- 672    Logan, M. L., I. A. Minnaar, K. M. Keegan, and S. Clusella-Trullas, 2020. The evolution-  
673    ary potential of an insect invader under climate change. *Evolution* 74:132–144. URL  
674    <https://onlinelibrary.wiley.com/doi/abs/10.1111/evo.13862>.
- 675    Lynch, M. and B. Walsh, 1998. *Genetics and Analysis of Quantitative Traits*. Sinauer Associates,  
676    Inc., Sunderland.
- 677    Maclean, H. J., J. G. Sørensen, L. V. Kristensen, T. N., K. Beedholm, V. Kellermann, and J. Over-  
678    gaard, 2019. Evolution and plasticity of thermal performance: an analysis of variation in thermal  
679    tolerance and fitness in 22 drosophila species. *Phil Trans R Soc B* 374:20180548.
- 680    Manenti, T., V. Loeschke, N. N. Moghadam, and J. G. Sørensen, 2015. Phenotypic plas-  
681    ticity is not affected by experimental evolution in constant, predictable or unpredictable  
682    fluctuating thermal environments. *Journal of Evolutionary Biology* 28:2078–2087. URL  
683    <http://dx.doi.org/10.1111/jeb.12735>.
- 684    Martin, C. E., D. Siegel, and L. R. Aaronson, 1981. Effects of temperature ac-  
685    climation on *Neurospora* phospholipids fatty acid desaturation appears to be a  
686    key element in modifying phospholepid fluid properties. *Biochimica et Bio-*  
687    *physica Acta (BBA) - Lipids and Lipid Metabolism* 665:399 – 407. URL  
688    <http://www.sciencedirect.com/science/article/pii/0005276081902526>.
- 689    Martins, F., L. Kruuk, J. Llewelyn, C. Moritz, and B. Phillips, 2019. Heritabil-  
690    ity of climate-relevant traits in a rainforest skink. *Heredity* 122:41–52. URL  
691    <https://doi.org/10.1038/s41437-018-0085-y>.
- 692    McCluskey, K., A. Wiest, and M. Plamann, 2010. The fungal genetics stock center: a repository  
693    for 50 years of fungal genetics research. *J Biosci* 35:119–126.

- 694 McElreath, R., 2015. Statistical Rethinking - A Bayesian course with examples in R and Stan.  
695 CRC Press, New York.
- 696 Merilä, J. and A. P. Hendry, 2014. Climate change, adaptation, and pheno-  
697 typic plasticity: the problem and the evidence. *Evol Appl* 7:1–14. URL  
698 <http://dx.doi.org/10.1111/eva.12137>.
- 699 Mohsenzadeh, S., W. Saupe-Thies, G. Steier, T. Schroeder, F. Fracella, P. Ruoff, and  
700 L. Rensing, 1998. Temperature adaptation of house keeping and heat shock gene  
701 expression in *Neurospora crassa*. *Fungal Genetics and Biology* 25:31 – 43. URL  
702 <http://www.sciencedirect.com/science/article/pii/S1087184598910817>.
- 703 Morrissey, M. B., L. E. B. Kruuk, and A. J. Wilson, 2010. The dan-  
704 ger of applying the breeder's equation in observational studies of natu-  
705 ral populations. *Journal of Evolutionary Biology* 23:2277–2288. URL  
706 <https://onlinelibrary.wiley.com/doi/abs/10.1111/j.1420-9101.2010.02084.x>.
- 707 Mäki-Tanila, A. and W. G. Hill, 2014. Influence of gene interaction on com-  
708 plex trait variation with multilocus models. *Genetics* 198:355–367. URL  
709 <http://www.genetics.org/content/198/1/355.abstract>.
- 710 Palma-Guerrero, J., C. R. Hall, D. Kowbel, J. Welch, J. W. Taylor, R. B. Brem, and N. L. Glass,  
711 2013. Genome wide association identifies novel loci involved in fungal communication. *PLoS*  
712 *Genetics* 9:e1003669.
- 713 Piper, P. W., 1993. Molecular events associated with acquisition of heat tolerance by  
714 the yeast *Saccharomyces cerevisiae*. *FEMS Microbiology Reviews* 11:339–355. URL  
715 <https://onlinelibrary.wiley.com/doi/abs/10.1111/j.1574-6976.1993.tb00005.x>.
- 716 Plesofsky-Vig, N. and R. Brambl, 1985. Heat shock response of *Neurospora crassa*: Protein syn-  
717 thesis and induced thermotolerance. *Journal of Bacteriology* 162:1083–1091.

- 718 Powles, S. B. and Q. Yu, 2010. Evolution in action: Plants resis-  
719 tant to herbicides. *Annual Review of Plant Biology* 61:317–347. URL  
720 <https://doi.org/10.1146/annurev-arplant-042809-112119>.
- 721 R Core Team, 2019. R: A language and environment for statistical computing. R Foundation for  
722 Statistical Computing, Vienna, Austria. URL <http://www.R-project.org>.
- 723 Roche, C. M., J. J. Loros, K. McCluskey, and N. L. Glass, 2014. *Neurospora crassa*: look-  
724 ing back and looking forward at a model microbe. *Am J Bot* 101:2022–2035. URL  
725 <http://dx.doi.org/10.3732/ajb.1400377>.
- 726 Romero-Olivares, A. L., J. W. Taylor, and K. K. Treseder, 2015. *Neurospora discreta* as a model  
727 to assess adaptation of soil fungi to warming. *BMC Evol Biol* 15:198.
- 728 Savage, V., J. Gillooly, J. Brown, G. West, and E. Charnov, 2004. Effects of body size  
729 and temperature on population growth. *The American Naturalist* 163:429–441. URL  
730 <https://doi.org/10.1086/381872>. PMID: 15026978.
- 731 Scheiner, S. M., 1993. Genetics and evolution of pheno-  
732 typic plasticity. *Annu. Rev. Ecol. Syst.* 24:35–68. URL  
733 <http://dx.doi.org/10.1146/annurev.es.24.110193.000343>.
- 734 Schluter, D., 1996. Adaptive radiation along genetic lines of least resistance. *Evolution* 50:1766–  
735 1774. URL <http://www.jstor.org/stable/2410734>.
- 736 Schulte, P. M., 2015. The effects of temperature on aerobic metabolism: to-  
737 wards a mechanistic understanding of the responses of ectotherms to a chang-  
738 ing environment. *Journal of Experimental Biology* 218:1856–1866. URL  
739 <https://jeb.biologists.org/content/218/12/1856>.
- 740 Sinclair, B. J., K. E. Marshall, M. A. Sewell, D. L. Levesque, C. S. Willett, S. Slotsbo, Y. Dong,  
741 C. D. G. Harley, D. J. Marshall, B. S. Helmuth, and R. B. Huey, 2016. Can we predict ectotherm

- 742 responses to climate change using thermal performance curves and body temperatures? *Ecology*  
743 *Letters* 19:1372–1385. URL <http://dx.doi.org/10.1111/ele.12686>.
- 744 Stinchcombe, J. R., R. Izem, M. S. Heschel, B. V. McGoey, and J. Schmitt, 2010. Across-  
745 environment genetic correlations and the frequency of selective environments shape the  
746 evolutionary dynamics of growth rate in *Impatiens capensis*. *Evolution* 64:2887–2903. URL  
747 <https://onlinelibrary.wiley.com/doi/abs/10.1111/j.1558-5646.2010.01060.x>.
- 748 Sørensen, J. G., T. N. Kristensen, and V. Loeschcke, 2003. The evolutionary and  
749 ecological role of heat shock proteins. *Ecology Letters* 6:1025–1037. URL  
750 <https://onlinelibrary.wiley.com/doi/abs/10.1046/j.1461-0248.2003.00528.x>.
- 751 Sørensen, J. G., C. R. White, G. A. Duffy, and S. L. Chown, 2018. A widespread thermodynamic  
752 effect, but maintenance of biological rates through space across life’s major domains. *Proc Biol*  
753 *Sci* 285:20181775.
- 754 Turner, B. C., D. D. Perkins, and F. A., 2001. *Neurospora* from natural populations: A global study.  
755 *Fungal Genetics and Biology* 32:67–92.
- 756 Tüzün, N. and R. Stoks, 2018. Evolution of geographic variation in ther-  
757 mal performance curves in the face of climate change and implications for bi-  
758 otic interactions. *Current Opinion in Insect Science* 29:78 – 84. URL  
759 <http://www.sciencedirect.com/science/article/pii/S2214574518300014>.
- 760 Vehtari, A., A. Gelman, and J. Gabry, 2017. Practical bayesian model evaluation using  
761 leave-one-out cross-validation and WAIC. *Statistics and Computing* 27:1413–1432. URL  
762 <https://doi.org/10.1007/s11222-016-9696-4>.
- 763 Venables, W. N. and B. D. Ripley, 2002. *Modern Applied Statistics with S*. 4th ed. Springer, New  
764 York.
- 765 Walsh, B. and M. W. Blows, 2009. Abundant genetic variation + strong se-  
766 lection = multivariate genetic constraints: A geometric view of adaptation.

767 Annual Review of Ecology, Evolution, and Systematics 40:41–59. URL

768 <https://doi.org/10.1146/annurev.ecolsys.110308.120232>.

769 Whitlock, M. C., 1996. The red queen beats the jack-of-all-trades: The limitations on the evolu-

770 tion of phenotypic plasticity and niche breadth. *The American Naturalist* 148:S65–S77. URL

771 <http://www.jstor.org/stable/2463048>.



## 772 **Tables**

Table 1: Genetic variances, covariances, correlations, and environmental variances for growth rates in different temperatures estimated from the multivariate model. The diagonal (in bold) contains genetic variances ( $\sigma_G^2$ ), upper triangle contains genetic covariances ( $\sigma_{G_x}\sigma_{G_y}r_{G_x,y}$ ), and lower triangle contains genetic correlations ( $r_{G_x,y}$ ). The last column contains environmental variances ( $\sigma_E^2$ ). Estimates are posterior means with 95% HPD intervals shown in parenthesis.

| (°C) | 20                      | 25                      | 30                      | 35                     | 37.5                    | 40                     | $\sigma_E^2$     |
|------|-------------------------|-------------------------|-------------------------|------------------------|-------------------------|------------------------|------------------|
| 20   | <b>0.08 (0.07–0.09)</b> | 0.11 (0.1–0.13)         | 0.14 (0.12–0.16)        | 0.15 (0.13–0.18)       | 0.13 (0.11–0.15)        | 0.07 (0.05–0.09)       | 0.01 (0.01–0.01) |
| 25   | 0.94 (0.93–0.96)        | <b>0.17 (0.15–0.19)</b> | 0.22 (0.19–0.25)        | 0.24 (0.21–0.28)       | 0.19 (0.16–0.22)        | 0.11 (0.09–0.14)       | 0.02 (0.02–0.02) |
| 30   | 0.86 (0.83–0.89)        | 0.96 (0.94–0.97)        | <b>0.32 (0.28–0.36)</b> | 0.36 (0.31–0.41)       | 0.28 (0.23–0.32)        | 0.17 (0.13–0.21)       | 0.04 (0.03–0.04) |
| 35   | 0.75 (0.7–0.79)         | 0.83 (0.79–0.86)        | 0.9 (0.88–0.92)         | <b>0.5 (0.43–0.57)</b> | 0.42 (0.36–0.48)        | 0.25 (0.2–0.3)         | 0.06 (0.05–0.07) |
| 37.5 | 0.68 (0.62–0.73)        | 0.7 (0.65–0.75)         | 0.75 (0.7–0.8)          | 0.9 (0.88–0.92)        | <b>0.43 (0.37–0.49)</b> | 0.3 (0.25–0.35)        | 0.09 (0.08–0.1)  |
| 40   | 0.42 (0.33–0.51)        | 0.47 (0.39–0.56)        | 0.51 (0.43–0.59)        | 0.61 (0.54–0.68)       | 0.77 (0.72–0.82)        | <b>0.34 (0.29–0.4)</b> | 0.2 (0.18–0.22)  |

Table 2: Comparison of different models for relationship between genetic correlations and temperature differences. Model terms correspond to different deterministic parts of the model in equation 4,  $\alpha_{40}$  is an intercept effect for correlations involving 40 °C and  $\beta_{40}$  is a slope effect for correlations involving 40 °C. LOOIC = Leave-one-out information criterion. SE = standard error.

| Model terms                                                                             | LOOIC  | diff ( $\pm$ SE) | weight |
|-----------------------------------------------------------------------------------------|--------|------------------|--------|
| $\alpha + \alpha_{40} \times c_i + \beta \times d_i$                                    | -38.54 | 0 (0)            | 0.84   |
| $\alpha + \alpha_{40} \times c_i + \beta \times d_i + \beta_{40} \times d_i \times c_i$ | -35.18 | 3.36 (1.24)      | 0.16   |
| $\alpha + \beta \times d_i + \beta_{40} \times d_i \times c_i$                          | -26.07 | 12.47 (5.49)     | 0      |
| $\alpha + \beta \times d_i$                                                             | -14.12 | 24.42 (5.54)     | 0      |
| $\alpha$                                                                                | -7.61  | 30.93 (6.34)     | 0      |

Table 3: Conditional evolvabilities ( $c_i$ ) and autonomies ( $a_i$ ) for growth rates at different temperatures, values are posterior medians and 95% HPD interval is shown in parenthesis. For conditional evolvability values for both without standardization and with mean standardized G-matrices are shown. Values for trait specific autonomy are the same with and without standardization.

| (°C) | No standardization  |  | Mean standardized      |                  |
|------|---------------------|--|------------------------|------------------|
|      | $c_i$               |  | $c_i$                  | $a_i$            |
| 20   | 0.006 (0.004–0.008) |  | 0.0013 (0.0008–0.0018) | 0.07 (0.05–0.10) |
| 25   | 0.004 (0.003–0.006) |  | 0.0005 (0.0003–0.0007) | 0.03 (0.02–0.04) |
| 30   | 0.012 (0.008–0.017) |  | 0.0008 (0.0006–0.0011) | 0.04 (0.03–0.05) |
| 35   | 0.029 (0.021–0.038) |  | 0.0017 (0.0012–0.0022) | 0.06 (0.04–0.08) |
| 37.5 | 0.033 (0.022–0.045) |  | 0.0026 (0.0017–0.0035) | 0.08 (0.05–0.11) |
| 40   | 0.106 (0.075–0.139) |  | 0.0190 (0.0134–0.0249) | 0.31 (0.22–0.40) |

## 773 Supplementary Information

### 774 Supplementary Figures

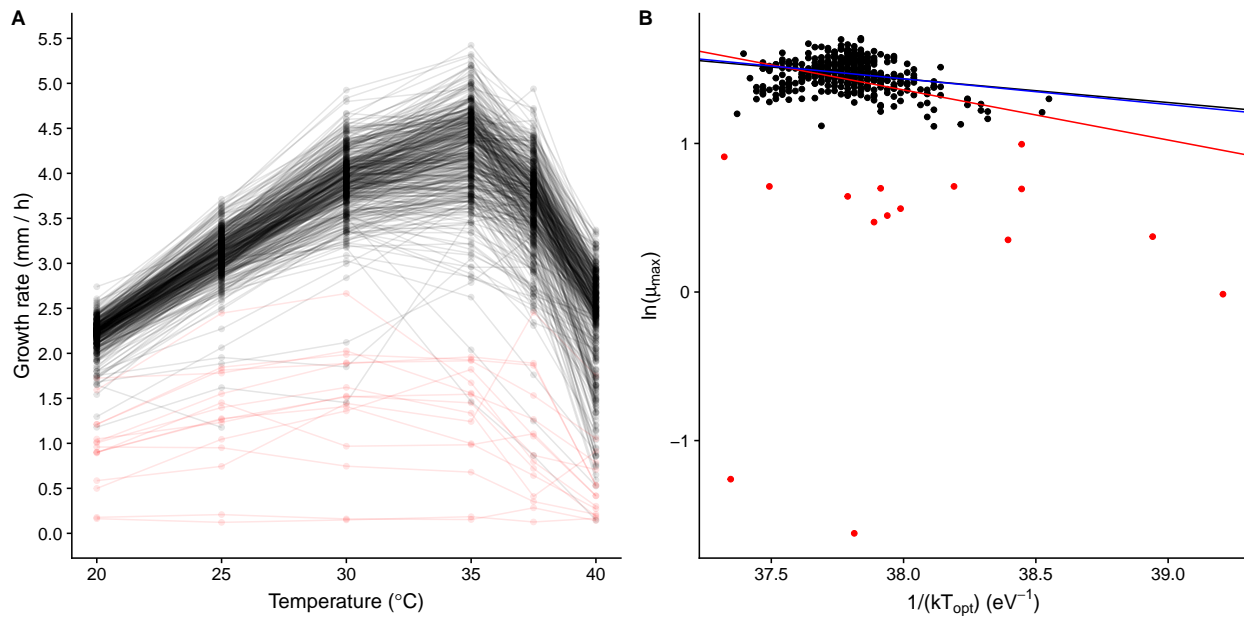

Figure S1: A) Phenotypic means for each genotype, those genotypes that were removed from the thermodynamic analysis as outliers are coloured red. B) Logarithm of maximum growth rate,  $\mu_{max}$ , plotted against inverse of  $kT_{opt}$ . Datapoints that were removed as outliers are coloured red. Black regression line is ordinary regression fitted to the data without outliers (red points removed), slope ( $\pm$ SE) is  $-0.16(\pm 0.03)$ . Red line is ordinary regression fitted to all of the data, slope is  $-0.34(\pm 0.06)$ . Blue line is robust regression with bisquare weights fitted to all of the data, slope is  $-0.17(\pm 0.03)$ .

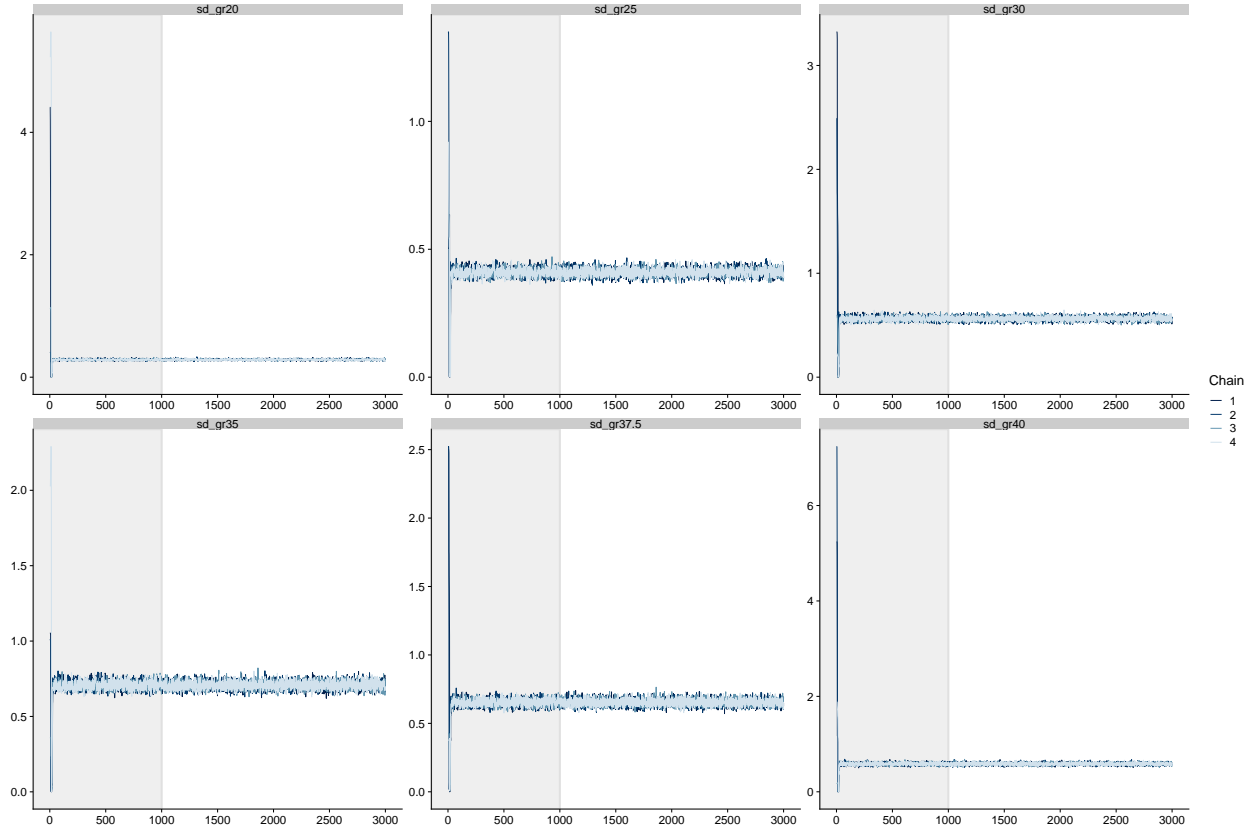

Figure S2: Example MCMC traceplots for genetic standard deviations of growth rates in different temperatures in the multivariate model. The grey shaded area denotes the warmup iterations which were discarded from the final parameter estimates. In this example four independent chains were initialized at random values; the chains rapidly converge to the same distribution during warmup. No divergent transitions were observed in this run.

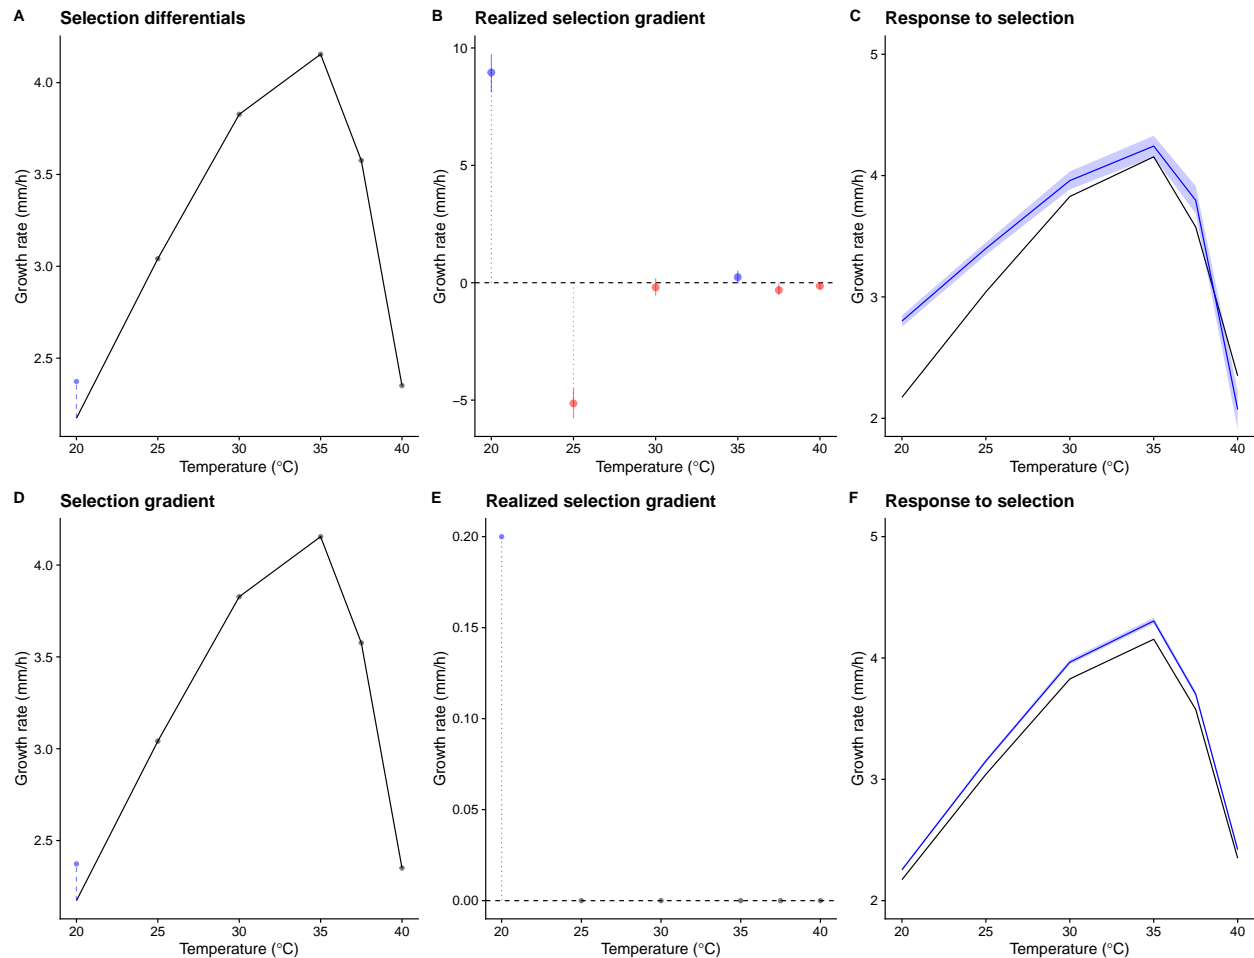

Figure S3: Illustration on how selection differential and selection gradient generate different responses to selection. Top row: selection based on selection differentials. A) There is selection for increased growth at at 20 °C and to maintain the original phenotype for the other traits. Black line is the empirical performance curve and blue dots represent selection differentials for each temperature,  $\mathbf{S} = \{0.2, 0, 0, 0, 0, 0\}$ . B) The realized selection gradient ( $\beta = \mathbf{P}^{-1}\mathbf{S}$ ) implied by this selection differential. C) Blue line shows the mean phenotype after 5 generations of selection, shaded area contains 95% of the simulations. Bottom row: selection based on selection gradient. D) There is selection for increased growth at 20 °C as in A) but selection gradient is  $\beta = \{0.2, 0, 0, 0, 0, 0\}$ . E) Now realized selection gradient is the same as in (D), there is selection for increased growth in one temperature but phenotypes of other temperatures are selectively neutral. E) Response to selection after 5 generations of selection as in (C) for this selection gradient. Selection using similar selection differentials and selection gradient leads to different phenotypic responses.

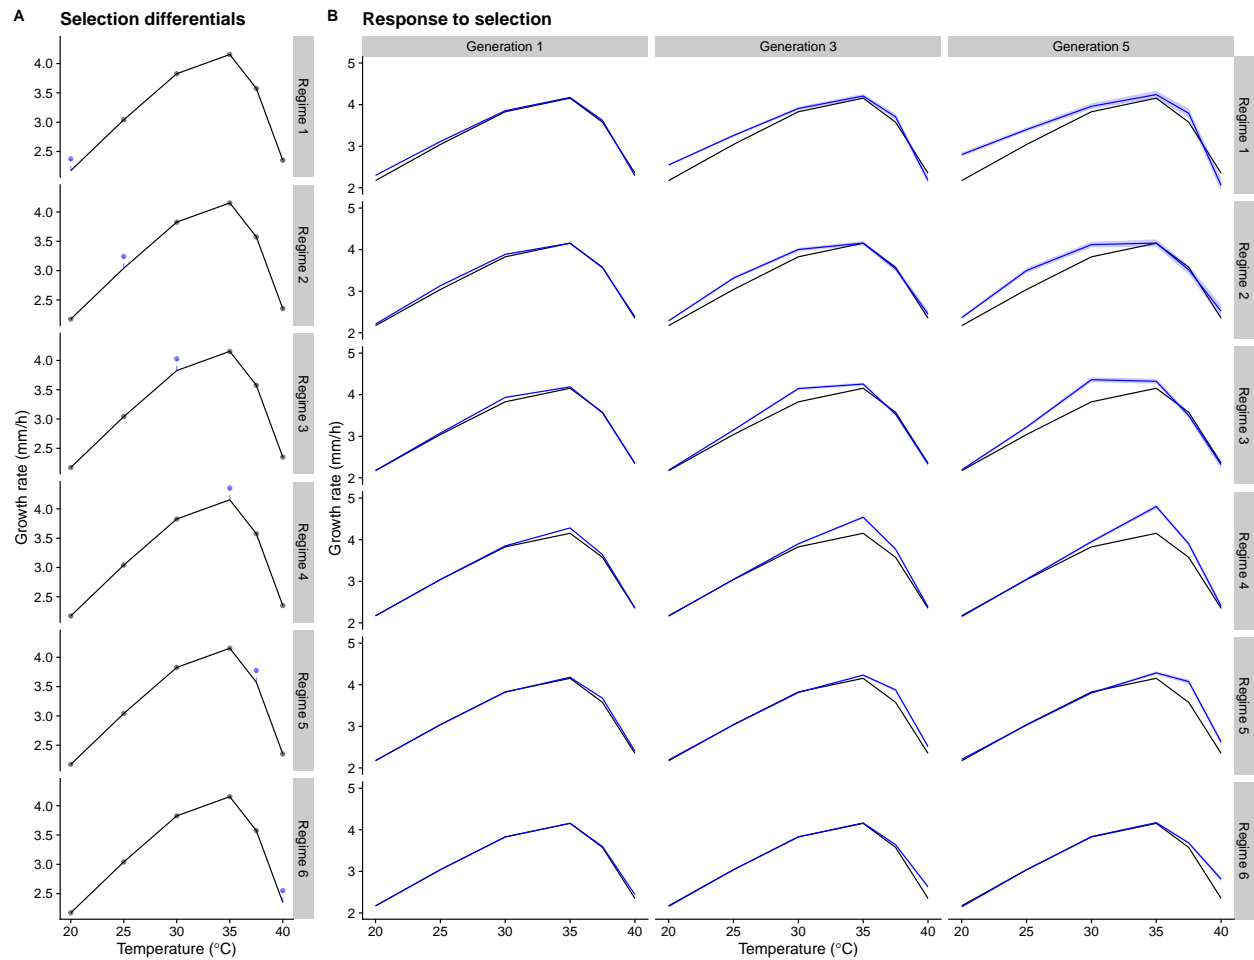

Figure S4: Selection for increased growth rate in a single temperature. Selection differential is 0.2 mm/h at each generation. A) Selection differentials for each selection regime. B) Simulated responses to selection.

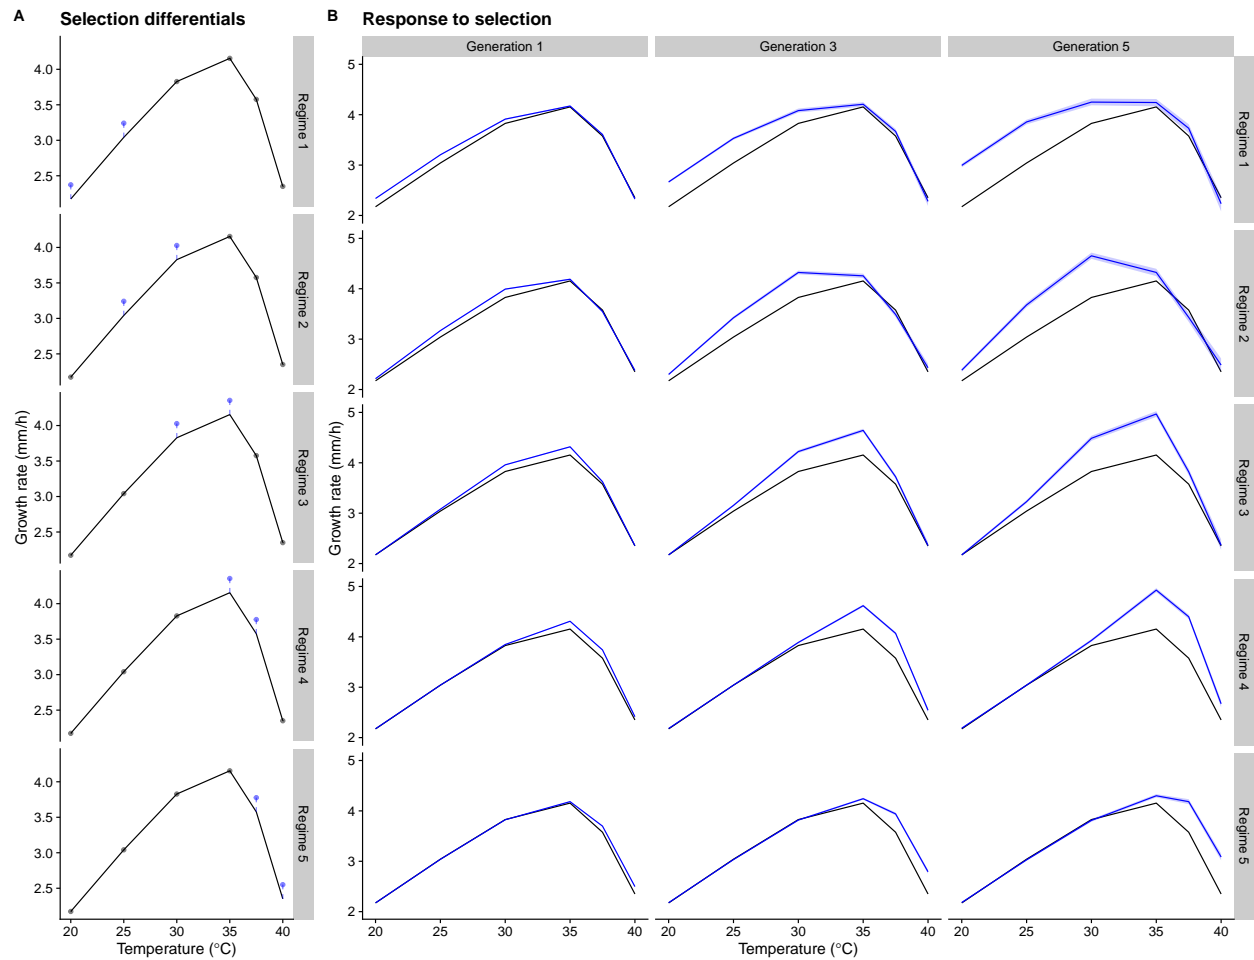

Figure S5: Selection for increased growth rate in two temperatures. Selection differential is 0.2 mm/h at each generation for each temperature, so 0.4 in total for each selection regime. A) Selection differentials for each selection regime. B) Simulated responses to selection.



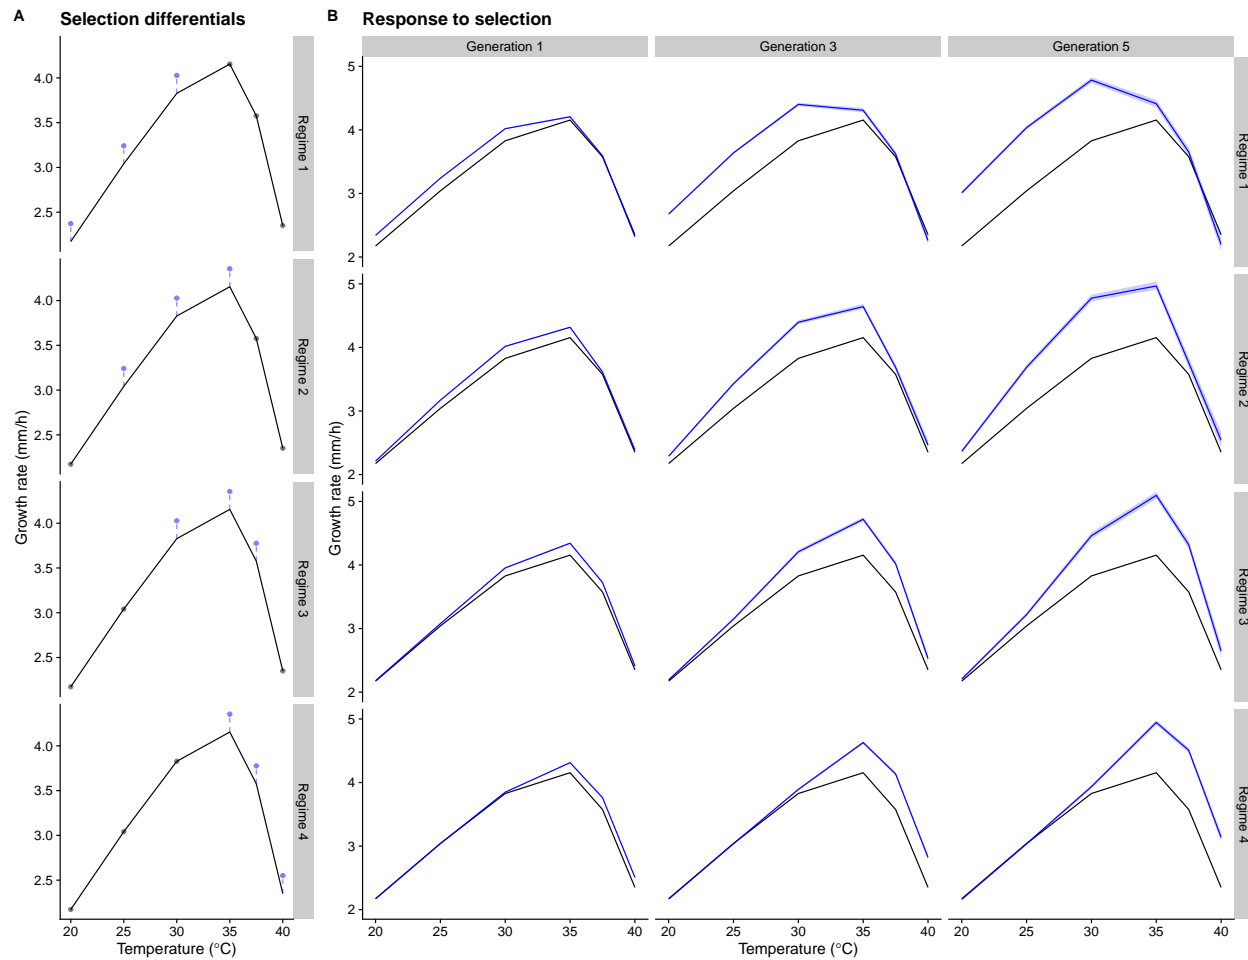

Figure S6: Selection for increased growth rate in three temperatures. Selection differential is 0.2 mm/h at each generation for each temperature, so 0.6 in total for each selection regime. A) Selection differentials for each selection regime. B) Simulated responses to selection.

## 775 Supplementary Tables

Table S1: List of strains. Column origin indicates whether strain was sampled from a natural population or if it was from a family obtained by crossing two natural strains. Column source indicates which strains were obtained from the Fungal Genetics Stock Center (FGSC) and which were generated in this study. LA = Louisiana, USA. FL = Florida, USA. Strains 10948 and 10886 are parents of family A, 10932 and 1165 are parents of family B, 4498 and 8816 are parents of family C, 3223 and 8845 are parents of family D, and 10904 and 851 are parents of family G.

| Strain | Origin             | Source | Collection site        |
|--------|--------------------|--------|------------------------|
| 847    | Natural population | FGSC   | LA                     |
| 851    | Natural population | FGSC   | Costa Rica             |
| 1131   | Natural population | FGSC   | Panama                 |
| 1132   | Natural population | FGSC   | Panama                 |
| 1133   | Natural population | FGSC   | Panama                 |
| 1165   | Natural population | FGSC   | Panama                 |
| 1693   | Natural population | FGSC   | LA                     |
| 2229   | Natural population | FGSC   | Welsh, LA              |
| 2489   | Laboratory strain  | FGSC   | Marrero, LA            |
| 3200   | Natural population | FGSC   | Coon, LA               |
| 3210   | Natural population | FGSC   | Sugartown, LA          |
| 3211   | Natural population | FGSC   | Sugartown, LA          |
| 3212   | Natural population | FGSC   | Ravenswood, LA         |
| 3223   | Natural population | FGSC   | Elizabeth, LA          |
| 3943   | Natural population | FGSC   | Houma, LA              |
| 3968   | Natural population | FGSC   | Okeechobee, FL         |
| 3975   | Natural population | FGSC   | FL                     |
| 4448   | Natural population | FGSC   | Franklin, LA           |
| 4452   | Natural population | FGSC   | Franklin, LA           |
| 4459   | Natural population | FGSC   | Franklin, LA           |
| 4479   | Natural population | FGSC   | Franklin, LA           |
| 4494   | Natural population | FGSC   | Franklin, LA           |
| 4496   | Natural population | FGSC   | Franklin, LA           |
| 4497   | Natural population | FGSC   | Franklin, LA           |
| 4498   | Natural population | FGSC   | Franklin, LA           |
| 4708   | Natural population | FGSC   | Haiti                  |
| 4712   | Natural population | FGSC   | Haiti                  |
| 4713   | Natural population | FGSC   | Haiti                  |
| 4715   | Natural population | FGSC   | Haiti                  |
| 4716   | Natural population | FGSC   | Haiti                  |
| 4730   | Natural population | FGSC   | Venezuela              |
| 4824   | Natural population | FGSC   | Haiti                  |
| 5910   | Natural population | FGSC   | Digitima Creek, Guyana |

Continued on next page. . .

Table S1 – Continued

| Strain | Origin             | Source | Collection site         |
|--------|--------------------|--------|-------------------------|
| 5914   | Natural population | FGSC   | Torani Canal, Guyana    |
| 6203   | Natural population | FGSC   | Aguda Rd, Costa Rica    |
| 8783   | Natural population | FGSC   | Homestead, FL           |
| 8784   | Natural population | FGSC   | Homestead, FL           |
| 8787   | Natural population | FGSC   | Homestead, FL           |
| 8789   | Natural population | FGSC   | Homestead, FL           |
| 8790   | Natural population | FGSC   | Homestead, FL           |
| 8816   | Natural population | FGSC   | Carrefour Dufort, Haiti |
| 8819   | Natural population | FGSC   | Carrefour Dufort, Haiti |
| 8829   | Natural population | FGSC   | Tiassale, Ivory Coast   |
| 8845   | Natural population | FGSC   | Kabah, Yucatan, Mexico  |
| 8848   | Natural population | FGSC   | Sayil, Yucatan, Mexico  |
| 8850   | Natural population | FGSC   | Uxmal, Yucatan, Mexico  |
| 8851   | Natural population | FGSC   | Uman, Yucatan, Mexico   |
| 10881  | Natural population | FGSC   | Franklin, LA            |
| 10882  | Natural population | FGSC   | Franklin, LA            |
| 10883  | Natural population | FGSC   | Franklin, LA            |
| 10884  | Natural population | FGSC   | Franklin, LA            |
| 10885  | Natural population | FGSC   | Franklin, LA            |
| 10886  | Natural population | FGSC   | Franklin, LA            |
| 10887  | Natural population | FGSC   | Franklin, LA            |
| 10888  | Natural population | FGSC   | Franklin, LA            |
| 10889  | Natural population | FGSC   | Franklin, LA            |
| 10890  | Natural population | FGSC   | Marrero, LA             |
| 10891  | Natural population | FGSC   | Welsh, LA               |
| 10892  | Natural population | FGSC   | Northside Planting, LA  |
| 10893  | Natural population | FGSC   | Houma, LA               |
| 10894  | Natural population | FGSC   | Houma, LA               |
| 10895  | Natural population | FGSC   | Welsh, LA               |
| 10896  | Natural population | FGSC   | Iowa, LA                |
| 10897  | Natural population | FGSC   | Iowa, LA                |
| 10898  | Natural population | FGSC   | Iowa, LA                |
| 10899  | Natural population | FGSC   | Marrero, LA             |
| 10900  | Natural population | FGSC   | Houma, LA               |
| 10901  | Natural population | FGSC   | Houma, LA               |
| 10902  | Natural population | FGSC   | Houma, LA               |
| 10903  | Natural population | FGSC   | Houma, LA               |
| 10904  | Natural population | FGSC   | Houma, LA               |
| 10905  | Natural population | FGSC   | Welsh, LA               |
| 10906  | Natural population | FGSC   | Roanoke, LA             |
| 10907  | Natural population | FGSC   | Roanoke, LA             |
| 10908  | Natural population | FGSC   | Roanoke, LA             |
| 10909  | Natural population | FGSC   | Iowa, LA                |
| 10910  | Natural population | FGSC   | Iowa, LA                |
| 10911  | Natural population | FGSC   | Elizabeth, LA           |

Continued on next page. . .

Table S1 – Continued

| Strain | Origin             | Source     | Collection site          |
|--------|--------------------|------------|--------------------------|
| 10912  | Natural population | FGSC       | Elizabeth, LA            |
| 10914  | Natural population | FGSC       | Northside Plantation, LA |
| 10915  | Natural population | FGSC       | Franklin, LA             |
| 10916  | Natural population | FGSC       | Houma, LA                |
| 10917  | Natural population | FGSC       | Elizabeth, LA            |
| 10918  | Natural population | FGSC       | Bayou Chicot, LA         |
| 10919  | Natural population | FGSC       | Coon, LA                 |
| 10920  | Natural population | FGSC       | Fred, LA                 |
| 10921  | Natural population | FGSC       | Franklin, LA             |
| 10922  | Natural population | FGSC       | Welsh, LA                |
| 10923  | Natural population | FGSC       | Welsh, LA                |
| 10925  | Natural population | FGSC       | Roanoke, LA              |
| 10926  | Natural population | FGSC       | Coon, LA                 |
| 10927  | Natural population | FGSC       | Coon, LA                 |
| 10928  | Natural population | FGSC       | Georgia Plantation, LA   |
| 10929  | Natural population | FGSC       | Georgia Plantation, LA   |
| 10930  | Natural population | FGSC       | Houma, LA                |
| 10931  | Natural population | FGSC       | Houma, LA                |
| 10932  | Natural population | FGSC       | Welsh, LA                |
| 10934  | Natural population | FGSC       | Roanoke, LA              |
| 10935  | Natural population | FGSC       | Welsh, LA                |
| 10936  | Natural population | FGSC       | Welsh, LA                |
| 10937  | Natural population | FGSC       | Welsh, LA                |
| 10938  | Natural population | FGSC       | Roanoke, LA              |
| 10939  | Natural population | FGSC       | Sugartown, LA            |
| 10941  | Natural population | FGSC       | Iowa, LA                 |
| 10942  | Natural population | FGSC       | Iowa, LA                 |
| 10943  | Natural population | FGSC       | Iowa, LA                 |
| 10946  | Natural population | FGSC       | Elizabeth, LA            |
| 10948  | Natural population | FGSC       | Bayou Chicot, LA         |
| 10950  | Natural population | FGSC       | Coon, LA                 |
| 10951  | Natural population | FGSC       | Coon, LA                 |
| 10954  | Natural population | FGSC       | Roanoke, LA              |
| 10982  | Natural population | FGSC       | Roanoke, LA              |
| 10983  | Natural population | FGSC       | Elizabeth, LA            |
| A1     | Family A           | This study | -                        |
| A2     | Family A           | This study | -                        |
| A3     | Family A           | This study | -                        |
| A4     | Family A           | This study | -                        |
| A5     | Family A           | This study | -                        |
| A6     | Family A           | This study | -                        |
| A7     | Family A           | This study | -                        |
| A8     | Family A           | This study | -                        |
| A9     | Family A           | This study | -                        |
| A10    | Family A           | This study | -                        |

Continued on next page...

Table S1 – Continued

| Strain | Origin   | Source     | Collection site |
|--------|----------|------------|-----------------|
| A11    | Family A | This study | -               |
| A12    | Family A | This study | -               |
| A13    | Family A | This study | -               |
| A14    | Family A | This study | -               |
| A15    | Family A | This study | -               |
| A16    | Family A | This study | -               |
| A17    | Family A | This study | -               |
| A18    | Family A | This study | -               |
| A19    | Family A | This study | -               |
| A20    | Family A | This study | -               |
| A21    | Family A | This study | -               |
| A22    | Family A | This study | -               |
| A23    | Family A | This study | -               |
| A24    | Family A | This study | -               |
| A25    | Family A | This study | -               |
| A26    | Family A | This study | -               |
| A27    | Family A | This study | -               |
| A28    | Family A | This study | -               |
| A29    | Family A | This study | -               |
| A30    | Family A | This study | -               |
| A31    | Family A | This study | -               |
| A32    | Family A | This study | -               |
| A33    | Family A | This study | -               |
| A34    | Family A | This study | -               |
| A35    | Family A | This study | -               |
| A36    | Family A | This study | -               |
| A37    | Family A | This study | -               |
| A38    | Family A | This study | -               |
| A39    | Family A | This study | -               |
| A40    | Family A | This study | -               |
| A41    | Family A | This study | -               |
| A42    | Family A | This study | -               |
| A43    | Family A | This study | -               |
| A44    | Family A | This study | -               |
| A45    | Family A | This study | -               |
| A46    | Family A | This study | -               |
| A47    | Family A | This study | -               |
| A48    | Family A | This study | -               |
| A49    | Family A | This study | -               |
| A50    | Family A | This study | -               |
| A51    | Family A | This study | -               |
| A52    | Family A | This study | -               |
| A53    | Family A | This study | -               |
| A54    | Family A | This study | -               |
| A55    | Family A | This study | -               |

Continued on next page...

Table S1 – Continued

| Strain | Origin   | Source     | Collection site |
|--------|----------|------------|-----------------|
| A56    | Family A | This study | -               |
| A57    | Family A | This study | -               |
| A58    | Family A | This study | -               |
| A59    | Family A | This study | -               |
| A60    | Family A | This study | -               |
| A61    | Family A | This study | -               |
| A62    | Family A | This study | -               |
| A63    | Family A | This study | -               |
| A64    | Family A | This study | -               |
| A65    | Family A | This study | -               |
| A66    | Family A | This study | -               |
| A67    | Family A | This study | -               |
| A68    | Family A | This study | -               |
| A69    | Family A | This study | -               |
| A70    | Family A | This study | -               |
| A71    | Family A | This study | -               |
| A72    | Family A | This study | -               |
| A73    | Family A | This study | -               |
| A74    | Family A | This study | -               |
| A75    | Family A | This study | -               |
| A76    | Family A | This study | -               |
| A77    | Family A | This study | -               |
| A78    | Family A | This study | -               |
| A79    | Family A | This study | -               |
| A80    | Family A | This study | -               |
| A81    | Family A | This study | -               |
| A82    | Family A | This study | -               |
| A83    | Family A | This study | -               |
| A84    | Family A | This study | -               |
| A85    | Family A | This study | -               |
| A86    | Family A | This study | -               |
| A87    | Family A | This study | -               |
| A88    | Family A | This study | -               |
| A89    | Family A | This study | -               |
| A90    | Family A | This study | -               |
| A91    | Family A | This study | -               |
| A92    | Family A | This study | -               |
| A93    | Family A | This study | -               |
| A94    | Family A | This study | -               |
| B1     | Family B | This study | -               |
| B2     | Family B | This study | -               |
| B3     | Family B | This study | -               |
| B4     | Family B | This study | -               |
| B5     | Family B | This study | -               |
| B6     | Family B | This study | -               |

Continued on next page...

Table S1 – Continued

| Strain | Origin   | Source     | Collection site |
|--------|----------|------------|-----------------|
| B7     | Family B | This study | -               |
| B8     | Family B | This study | -               |
| B9     | Family B | This study | -               |
| B10    | Family B | This study | -               |
| B11    | Family B | This study | -               |
| B12    | Family B | This study | -               |
| B13    | Family B | This study | -               |
| B14    | Family B | This study | -               |
| B15    | Family B | This study | -               |
| B16    | Family B | This study | -               |
| B17    | Family B | This study | -               |
| B18    | Family B | This study | -               |
| B19    | Family B | This study | -               |
| B20    | Family B | This study | -               |
| B21    | Family B | This study | -               |
| B22    | Family B | This study | -               |
| B23    | Family B | This study | -               |
| B24    | Family B | This study | -               |
| B25    | Family B | This study | -               |
| B26    | Family B | This study | -               |
| B27    | Family B | This study | -               |
| B28    | Family B | This study | -               |
| B29    | Family B | This study | -               |
| B30    | Family B | This study | -               |
| B31    | Family B | This study | -               |
| B32    | Family B | This study | -               |
| B33    | Family B | This study | -               |
| B34    | Family B | This study | -               |
| B35    | Family B | This study | -               |
| B36    | Family B | This study | -               |
| B37    | Family B | This study | -               |
| B38    | Family B | This study | -               |
| B39    | Family B | This study | -               |
| B40    | Family B | This study | -               |
| B41    | Family B | This study | -               |
| B42    | Family B | This study | -               |
| B43    | Family B | This study | -               |
| B44    | Family B | This study | -               |
| B45    | Family B | This study | -               |
| B46    | Family B | This study | -               |
| B47    | Family B | This study | -               |
| B48    | Family B | This study | -               |
| B49    | Family B | This study | -               |
| B50    | Family B | This study | -               |
| C1     | Family C | This study | -               |

Continued on next page...

Table S1 – Continued

| Strain | Origin   | Source     | Collection site |
|--------|----------|------------|-----------------|
| C2     | Family C | This study | -               |
| C3     | Family C | This study | -               |
| C4     | Family C | This study | -               |
| C5     | Family C | This study | -               |
| C6     | Family C | This study | -               |
| C7     | Family C | This study | -               |
| C8     | Family C | This study | -               |
| C9     | Family C | This study | -               |
| C10    | Family C | This study | -               |
| C11    | Family C | This study | -               |
| C12    | Family C | This study | -               |
| C13    | Family C | This study | -               |
| C14    | Family C | This study | -               |
| C15    | Family C | This study | -               |
| C16    | Family C | This study | -               |
| C17    | Family C | This study | -               |
| C18    | Family C | This study | -               |
| C19    | Family C | This study | -               |
| C20    | Family C | This study | -               |
| C21    | Family C | This study | -               |
| C22    | Family C | This study | -               |
| C23    | Family C | This study | -               |
| C24    | Family C | This study | -               |
| C25    | Family C | This study | -               |
| C26    | Family C | This study | -               |
| C27    | Family C | This study | -               |
| C28    | Family C | This study | -               |
| C29    | Family C | This study | -               |
| C30    | Family C | This study | -               |
| C31    | Family C | This study | -               |
| C32    | Family C | This study | -               |
| C33    | Family C | This study | -               |
| C34    | Family C | This study | -               |
| C35    | Family C | This study | -               |
| C36    | Family C | This study | -               |
| C37    | Family C | This study | -               |
| C38    | Family C | This study | -               |
| C39    | Family C | This study | -               |
| C40    | Family C | This study | -               |
| C41    | Family C | This study | -               |
| C42    | Family C | This study | -               |
| C43    | Family C | This study | -               |
| C44    | Family C | This study | -               |
| C45    | Family C | This study | -               |
| C46    | Family C | This study | -               |

Continued on next page...



Table S1 – Continued

| Strain | Origin   | Source     | Collection site |
|--------|----------|------------|-----------------|
| C47    | Family C | This study | -               |
| C48    | Family C | This study | -               |
| C49    | Family C | This study | -               |
| C50    | Family C | This study | -               |
| D1     | Family D | This study | -               |
| D2     | Family D | This study | -               |
| D3     | Family D | This study | -               |
| D4     | Family D | This study | -               |
| D5     | Family D | This study | -               |
| D6     | Family D | This study | -               |
| D7     | Family D | This study | -               |
| D8     | Family D | This study | -               |
| D9     | Family D | This study | -               |
| D10    | Family D | This study | -               |
| D11    | Family D | This study | -               |
| D12    | Family D | This study | -               |
| D13    | Family D | This study | -               |
| D14    | Family D | This study | -               |
| D15    | Family D | This study | -               |
| D16    | Family D | This study | -               |
| D17    | Family D | This study | -               |
| D18    | Family D | This study | -               |
| D19    | Family D | This study | -               |
| D20    | Family D | This study | -               |
| D21    | Family D | This study | -               |
| D22    | Family D | This study | -               |
| D23    | Family D | This study | -               |
| D24    | Family D | This study | -               |
| D25    | Family D | This study | -               |
| D26    | Family D | This study | -               |
| D27    | Family D | This study | -               |
| D28    | Family D | This study | -               |
| D29    | Family D | This study | -               |
| D30    | Family D | This study | -               |
| D31    | Family D | This study | -               |
| D32    | Family D | This study | -               |
| D33    | Family D | This study | -               |
| D34    | Family D | This study | -               |
| D35    | Family D | This study | -               |
| D36    | Family D | This study | -               |
| D37    | Family D | This study | -               |
| D38    | Family D | This study | -               |
| D39    | Family D | This study | -               |
| D40    | Family D | This study | -               |
| D41    | Family D | This study | -               |

Continued on next page...

Table S1 – Continued

| Strain | Origin   | Source     | Collection site |
|--------|----------|------------|-----------------|
| D42    | Family D | This study | -               |
| D43    | Family D | This study | -               |
| D44    | Family D | This study | -               |
| D45    | Family D | This study | -               |
| D46    | Family D | This study | -               |
| D47    | Family D | This study | -               |
| D48    | Family D | This study | -               |
| D49    | Family D | This study | -               |
| D50    | Family D | This study | -               |
| D51    | Family D | This study | -               |
| D52    | Family D | This study | -               |
| G1     | Family G | This study | -               |
| G3     | Family G | This study | -               |
| G4     | Family G | This study | -               |
| G5     | Family G | This study | -               |
| G6     | Family G | This study | -               |
| G7     | Family G | This study | -               |
| G8     | Family G | This study | -               |
| G10    | Family G | This study | -               |
| G11    | Family G | This study | -               |
| G12    | Family G | This study | -               |
| G13    | Family G | This study | -               |
| G14    | Family G | This study | -               |
| G15    | Family G | This study | -               |
| G16    | Family G | This study | -               |
| G17    | Family G | This study | -               |
| G18    | Family G | This study | -               |
| G19    | Family G | This study | -               |
| G20    | Family G | This study | -               |
| G21    | Family G | This study | -               |
| G22    | Family G | This study | -               |
| G23    | Family G | This study | -               |
| G24    | Family G | This study | -               |
| G25    | Family G | This study | -               |
| G26    | Family G | This study | -               |
| G27    | Family G | This study | -               |
| G28    | Family G | This study | -               |
| G29    | Family G | This study | -               |
| G30    | Family G | This study | -               |
| G31    | Family G | This study | -               |
| G32    | Family G | This study | -               |
| G33    | Family G | This study | -               |
| G34    | Family G | This study | -               |
| G35    | Family G | This study | -               |
| G36    | Family G | This study | -               |

Continued on next page...

Table S1 – Continued

| Strain | Origin   | Source     | Collection site |
|--------|----------|------------|-----------------|
| G37    | Family G | This study | -               |
| G38    | Family G | This study | -               |
| G39    | Family G | This study | -               |
| G40    | Family G | This study | -               |
| G41    | Family G | This study | -               |
| G42    | Family G | This study | -               |
| G43    | Family G | This study | -               |
| G44    | Family G | This study | -               |
| G45    | Family G | This study | -               |
| G46    | Family G | This study | -               |
| G47    | Family G | This study | -               |
| G48    | Family G | This study | -               |
| G49    | Family G | This study | -               |
| G50    | Family G | This study | -               |
| G52    | Family G | This study | -               |
| G53    | Family G | This study | -               |
| G54    | Family G | This study | -               |
| G55    | Family G | This study | -               |
| G56    | Family G | This study | -               |
| G57    | Family G | This study | -               |
| G58    | Family G | This study | -               |
| G59    | Family G | This study | -               |
| G60    | Family G | This study | -               |
| G61    | Family G | This study | -               |
| G62    | Family G | This study | -               |
| G63    | Family G | This study | -               |
| G64    | Family G | This study | -               |
| G65    | Family G | This study | -               |
| G66    | Family G | This study | -               |
| G67    | Family G | This study | -               |
| G68    | Family G | This study | -               |
| G69    | Family G | This study | -               |
| G70    | Family G | This study | -               |
| G71    | Family G | This study | -               |
| G72    | Family G | This study | -               |
